# Supplementary material for: Prediction of survival benefits from progression-free survival benefits in advanced non-small-cell lung cancer: evidence from a meta-analysis of 2334 patients from 5 randomised trials
Source: PubMed Central journal article supplement — BMJ Open. 2013 Mar 13;3(3):e001802. doi: 10.1136/bmjopen-2012-001802 (PMC3612819; doi:10.1136/bmjopen-2012-001802), 2013-03-13
Supplement: bmjopen-2012-001802.draft_revisions.pdf [file bmjopen-2012-001802.draft_revisions.pdf]

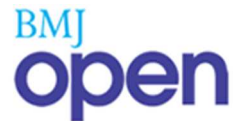

**Prediction of survival benefits from progression-free survival benefits in advanced non small cell lung cancer: evidence from a pooled analysis of 2,334 patients from 5 randomized trials**

|                                 |                                                                                                                                                                                                                                                                                                          |
|---------------------------------|----------------------------------------------------------------------------------------------------------------------------------------------------------------------------------------------------------------------------------------------------------------------------------------------------------|
| Journal:                        | <i>BMJ Open</i>                                                                                                                                                                                                                                                                                          |
| Manuscript ID:                  | bmjopen-2012-001802                                                                                                                                                                                                                                                                                      |
| Article Type:                   | Research                                                                                                                                                                                                                                                                                                 |
| Date Submitted by the Author:   | 12-Nov-2012                                                                                                                                                                                                                                                                                              |
| Complete List of Authors:       | Laporte, Silvy; University Hospital of saint-Etienne, Dept. of Clinical Pharmacology<br>Squifflet, Pierre<br>Baroux, Noémie; ICL,<br>Fossella, Frank<br>Georgoulas, Vassilis<br>Pujol, Jean-Louis<br>Douillard, Jean-Yves<br>Kudoh, Shinzohy<br>Pignon, Jean-Pierre<br>Quineaux, Emmanuel<br>Buyse, Marc |
| <b>Primary Subject Heading</b>: | Oncology                                                                                                                                                                                                                                                                                                 |
| Secondary Subject Heading:      | Complementary medicine, Pharmacology and therapeutics                                                                                                                                                                                                                                                    |
| Keywords:                       | CLINICAL PHARMACOLOGY, Adult oncology < ONCOLOGY, STATISTICS & RESEARCH METHODS, CHEMOTHERAPY, Clinical trials < THERAPEUTICS                                                                                                                                                                            |
|                                 |                                                                                                                                                                                                                                                                                                          |

SCHOLARONE™  
Manuscripts

1  
2  
3  
4  
5  
6  
7  
8  
9  
10  
11  
12  
13  
14  
15  
16  
17  
18  
19  
20  
21  
22  
23  
24  
25  
26  
27  
28  
29  
30  
31  
32  
33  
34  
35  
36  
37  
38  
39  
40  
41  
42  
43  
44  
45  
46  
47  
48  
49  
50  
51  
52  
53  
54  
55  
56  
57  
58  
59  
60

**Prediction of survival benefits from progression-free survival benefits in advanced non small cell lung cancer: evidence from a pooled analysis of 2,334 patients from 5 randomized trials**

Laporte S<sup>1,2</sup>, Squifflet P<sup>3</sup>, Baroux N<sup>4</sup>, Fossella F<sup>5</sup>, Georgoulas V<sup>6</sup>, Pujol JL<sup>7</sup>, Douillard JY<sup>8</sup>, Kudoh S<sup>9</sup>, Pignon JP<sup>10</sup>, Quinaux E<sup>3</sup>, Buyse M<sup>3,11</sup>

(1) Université Jean Monnet, Saint-Etienne, France

(2) INSERM, CIE3, Saint-Etienne, France

(3) IDDI, Louvain-la-Neuve, Belgium

(4) Institut Cancérologie de la Loire, France

(5) University of Texas MD Anderson Cancer Center, Houston, TX, USA

(6) University General Hospital of Heraklion, Heraklion, Greece

(7) University Hospital of Montpellier, France

(8) ICO Centre René Gauducheau, St Herblain, France

(9) Osaka City General Hospital, Osaka, Japan

(10) Meta-Analysis Unit, Institut Gustave Roussy, Villejuif, France

(11) Center for Statistics, Hasselt University, Diepenbeek, Belgium

**Address for correspondence and reprints:**

Marc Buyse, ScD, IDDI (International Drug Development Institute), 30 avenue Provinciale, 1340

Ottignies Louvain-la-Neuve, Belgium,

Tel: + 32 10614444, Fax: +32 10618888, marc.buyse@iddi.com

**Running head:** prediction of survival benefits in lung cancer

## ARTICLE SUMMARY

### 1) Article Focus

To investigate whether progression-free survival (PFS) can be considered a surrogate endpoint for overall survival (OS) in advanced non small cell lung cancer (NSCLC)

### 2) Key Messages

- Our analyses provide only modest support for considering PFS an acceptable surrogate for OS in patients with advanced NSCLC
- Only treatments that have a major impact on PFS (risk reduction of at least 50%) would be expected to also have a significant effect on OS

### 3) Strengths and Limitations

- Strengths : (1) analyses based on individual patient data, (2) widely accepted statistical methodology for surrogate endpoint validation
- Limitations : (1) data available on a limited number of trials, (2) results may not apply to targeted therapies

**ABSTRACT**

**Objectives.** To investigate whether progression-free survival (PFS) can be considered a surrogate endpoint for overall survival (OS) in advanced non small cell lung cancer (NSCLC).

**Design.** Meta-analysis of individual patient data from randomized trials

**Setting/Participants.** Randomized trials comparing docetaxel-based to vinorelbine-based chemotherapy for first-line treatment of NSCLC.

**Primary and secondary outcome measures:** Surrogacy of PFS for OS was assessed through the association between these endpoints and between the treatment effects on these endpoints. The surrogate threshold effect was the minimum treatment effect on PFS required to predict a non-zero treatment effect on OS.

**Results.** The median follow-up of patients still alive was 23.4 months. Median OS was 10.0 months and median PFS was 5.5 months. The treatment effects on PFS and on OS were correlated, whether using centers ( $R^2 = 0.62$ , 95% C.I. = 0.52–0.72) or prognostic strata ( $R^2 = 0.72$ , 95% C.I. = 0.60–0.84) as units of analysis. The surrogate threshold effect was a PFS hazard ratio of 0.49 using centers or 0.53 using prognostic strata.

**Conclusions.** These analyses provide only modest support for considering PFS an acceptable surrogate for OS in patients with advanced NSCLC. Only treatments that have a major impact on PFS (risk reduction of at least 50%) would be expected to also have a significant effect on OS. Whether these results also apply to targeted therapies is an open question that requires independent evaluation.

## INTRODUCTION

A surrogate endpoint is a measure that can substitute for a “final” or “true” clinical endpoint to predict patient outcomes earlier or more conveniently than with the true endpoint. The conditions required for an endpoint to be considered a valid surrogate have been intensely studied in the recent statistical literature, and whether a surrogate can ever be “validated” is still a matter of debate today. (1- 8) Two independent conditions have proven useful to explore potential surrogate endpoints in clinical settings: one stipulates that the surrogate endpoint should predict the clinical endpoint, the other that the effect of a treatment on the surrogate endpoint should predict the effect of that treatment on the true endpoint. (9)

Overall survival (OS) remains one of the most important clinical outcomes for assessing the efficacy of cancer treatments in randomized clinical trials. However, in most cases deaths occur only after prolonged follow-up, and with the increasing number of active cancer treatments, the effect of a first-line agent on OS may be confounded by subsequent therapies. Progression-free survival (PFS), measured from randomization until objective tumor progression or death, can be assessed earlier than OS, but whether it can be considered a valid surrogate for OS depends on the malignancy and the treatment under investigation. For example, OS differences can be reliably predicted from progression-free survival (PFS) differences in advanced colorectal cancer treated with fluoropyrimidines, but not in advanced breast cancer treated with anthracyclines or taxanes. (10-11)

We investigated whether PFS is an acceptable surrogate for OS in patients with advanced non-small cell lung cancer (NSCLC) using individual data from 2,334 patients enrolled in five randomized controlled trials comparing docetaxel-based with vinorelbine-based chemotherapy as first-line treatment for advanced NSCLC.

## PATIENTS AND METHODS

### ***Trials***

We analyzed data from 7 randomized controlled trials (12-18) included in a published meta-analysis of OS comparing docetaxel-based with vinca-alkaloids-based chemotherapy as first-line treatment for NSCLC. (19) Eligible trials included at least one treatment arm with either docetaxel alone or in combination with either a platinum agent (cisplatin or carboplatin) or gemcitabine and at least one vinca alkaloid-based treatment arm. Two of the seven trials included in the meta-analysis of OS could not be included in our analysis of surrogacy because the definition of PFS could not be ascertained reliably in spite of in-depth review of the case report forms. (13-14)

Table 1 provides details on the remaining five trials. The experimental arm consisted of docetaxel plus a platinum (cisplatin or carboplatin) in two trials, docetaxel plus gemcitabine in two trials, and docetaxel alone in one trial. The control arm consisted of vinorelbine plus cisplatin in four trials, and vinorelbine alone in one trial. Standard chemotherapy doses and schedules were used in the experimental and control arms.

*Table 1 here*

Table 2 shows the distribution of baseline patient characteristics in the 5 trials analyzed. The WGTOG trial only included patients  $\geq 70$  years and performance status  $\geq 1$ . (18) The Taxobel 303 trial only included stage IV patients. (15) Approximately three-quarters of the patients were male and one-third of the tumors were squamous cell carcinomas.

*Table 2 here*

### ***Data***

A first meta-analysis, based on summary data extracted from the papers describing the results of the 7 trials, suggested that docetaxel-based regimens were slightly superior to vinca-alkaloid-based regimens in terms of OS for first-line therapy of advanced NSCLC.

1  
2  
3 (19) A subsequent meta-analysis confirmed these results using individual patient data  
4 from a total of 322 centers participating in the same set of 7 trials. (20) The following  
5 data were requested for the subsequent meta-analysis: patient identifier, center identifier,  
6 randomization date, treatment assigned by randomization, age, gender, body mass index,  
7 performance status, stage, overall tumor response to the first assigned treatment, date of  
8 response, date of progression with the first allocated treatment, date of death or last visit,  
9 survival status, and cause of death if applicable.  
10  
11  
12  
13  
14  
15  
16

### 17 ***Time to Event Analyses***

18 Progression-free survival was defined as the time from random assignment to disease  
19 progression (as assessed in each individual trial) or death from any cause. Overall  
20 survival was defined as the time from random assignment to death from any cause. The  
21 distributions of PFS and OS were estimated using the Kaplan-Meier method. Treatment  
22 groups were compared using a Cox regression model. The median follow-up time was  
23 estimated using the Kaplan-Meier method with censoring for death.  
24  
25  
26  
27  
28  
29  
30

### 31 ***Surrogacy Analyses***

32 A two-level modeling approach was adopted to estimate the association between PFS and  
33 OS, and between the treatment effects on these endpoints. Treatment effects were  
34 estimated as logarithms of the hazard ratio (logHR). The logHR has intuitive appeal as a  
35 measure of treatment effect: it is equal to zero in the absence of a treatment effect, and is  
36 approximately equal to the risk reduction for small treatment effects (hence a logHR of -  
37 0.10 corresponds to a risk reduction of about 10%, and a logHR of 0.10 corresponds to a  
38 risk increase of about 10%). The logHRs were estimated within units of analysis  
39 consisting of 135 centers or 64 strata. Centers were either individual centers if they had  
40 more than 3 patients per treatment arm, or groups of small centers with an average size  
41 equal to the average size of the big centers of the same trial (Tax 326: average size = 15,  
42 Taxobel 303: average size = 17, HORG: average size = 25, WJTOG 9904: average size =  
43 14, French: average size = 20). Strata were defined within each trial by the cross-  
44 classification of the following prognostic factors: age (<60 vs. ≥ 60 years), gender (male  
45 vs. female), performance status (ECOG 0 or 1 vs. 2 or 3), BMI (<18.5 vs. ≥ 18.5 kg/m<sup>2</sup>),  
46  
47  
48  
49  
50  
51  
52  
53  
54  
55  
56  
57  
58  
59  
60

1  
2  
3 histology (squamous vs. non-squamous) and stage (IIIb vs. IV vs. unknown). Prognostic  
4 strata were formed as follows: a Cox model for overall survival was fit within each trial  
5 with treatment, each of the prognostic factors listed above, and the treatment-prognostic  
6 factor interaction. The prognostic factors were ordered by increasing level of significance  
7 for the treatment-prognostic factor interaction. The first prognostic factor selected in this  
8 way was the factor most predictive of the effect of treatment on overall survival, and was  
9 used to split the patients of a trial into two (or three) strata. Each of these strata was then  
10 split by the second prognostic factor; and so on. The splitting was stopped when it  
11 produced strata with less than 3 patients per treatment arm.  
12  
13  
14  
15  
16  
17  
18  
19

20  
21 The association between PFS and OS was quantified through a bivariate copula model  
22 fitted on individual patient data. Kendall's  $\tau$  was used to quantify the correlation between  
23 the endpoints. (21) A linear regression model was fitted on the estimated treatment  
24 effects on PFS and OS (logHRs for PFS and OS). Coefficients of determination (equal to  
25 squared correlation coefficients) were estimated using weighted linear regression. (21)  
26 Coefficients of determination ( $R^2$ ) quantify the proportion of variance explained by the  
27 regression. The surrogate threshold effect was defined as the minimum treatment effect  
28 on PFS required to predict a non-zero treatment effect on OS in a future trial. (22)  
29  
30  
31  
32  
33  
34  
35  
36  
37  
38

## 39 RESULTS

### 40 *Treatment Effects on PFS and OS*

41  
42 A total of 2,334 patients were included in the analysis. The median follow-up of patients  
43 still alive was 23.4 months. For the entire cohort, the median OS was 10.0 months and the  
44 median PFS was 5.5 months (Figure 1), with little difference between the curves until  
45 about 12 months.  
46  
47  
48  
49  
50  
51  
52  
53  
54  
55  
56  
57  
58  
59  
60

*Figure 1 here*



1  
2  
3 The hazard ratios were 0.97 for PFS (95% C.I., 0.89 – 1.05,  $P = .44$ ) and 0.92 for OS  
4 (95% C.I., 0.84 – 1.01,  $P = .089$ ) (Figure 2). There was significant heterogeneity between  
5 the 5 trials in terms of PFS ( $P = .0.01$ ) but not in terms of OS ( $P = .72$ )  
6  
7  
8  
9

10  
11 *Figure 2 here*  
12

### 13 14 ***Correlation between PFS and OS***

15 PFS showed some correlation with OS ( $\tau = 0.59$ ; 95% C.I., 0.58 – 0.61).  
16  
17

### 18 19 ***Correlation Between Treatment Effects***

20 The coefficient of determination between treatment effects estimated within centers was  
21  $R^2 = 0.62$  (95% C.I. = 0.52 – 0.72). The linear regression equation was  $\log\text{HR}(\text{OS}) = -$   
22  $0.048 + 0.76 \times \log\text{HR}(\text{PFS})$  (Figure 3). Using centers as the unit of analysis, the surrogate  
23 threshold effect was a PFS hazard ratio of 0.49, indicating that a risk reduction of 51% in  
24 terms of PFS would predict a non-zero effect on OS.  
25  
26  
27  
28  
29

30  
31  
32 *Figure 3 here*  
33

34  
35 The coefficient of determination between treatment effects estimated within strata was  $R^2$   
36  $= 0.88$  (95% C.I. = 0.60 – 0.84). The linear regression equation was  $\log\text{HR}(\text{OS}) = -0.071$   
37  $+ 0.87 \times \log\text{HR}(\text{OS})$  (Figure 4). Using strata as the unit of analysis, the surrogate  
38 threshold effect was a PFS hazard ratio of 0.53, indicating that a risk reduction of 47% in  
39 terms of PFS would predict a non-zero effect on OS.  
40  
41  
42  
43  
44

45  
46  
47 *Figure 4 here*  
48  
49  
50  
51  
52  
53  
54  
55  
56  
57  
58  
59  
60

## DISCUSSION

Our analyses suggest that PFS is not a statistically acceptable surrogate endpoint for OS in patients with metastatic non-small cell lung cancer treated in first line with docetaxel-based or vinorelbine-based chemotherapies. Indeed, although about two-thirds of the treatment effects on OS are explained by the treatment effects on PFS, the surrogate threshold effect ranges from 0.49 to 0.53 depending on whether strata or centers are used as the unit of analysis, which implies that only a major benefit of some new drug on PFS (hazard reduction of about one half or greater) would be expected to also produce a non-zero benefit on OS. These analyses are quite similar whether treatment effects are estimated in the centers participating to the trials, or in the strata defined by the characteristics of the patients most predictive of survival benefits, despite the fact that the latter analysis could have overestimated the association between the treatment effects through deliberate confounding by the prognostic factors used to define the strata.

In this set of trials, docetaxel-based regimens showed a trend towards better results than vinorelbine-based regimens, but the difference was not significant for either OS (HR = 0.92,  $P = .089$ ) or PFS (HR = 0.97,  $P = .44$ ). If anything, the difference was more pronounced for OS than for PFS, an unusual finding with advanced solid tumors, for which a benefit on PFS is generally diluted to yield a smaller benefit on OS. (10-11) Other meta-analyses did not support this finding. A meta-analysis comparing gemcitabine-platinum with other platinum-containing regimens found about the same benefit of gemcitabine-platinum on PFS (HR = 0.88, information available on 14 of 17 trials) as on OS (HR = 0.91 for the same 14 trials). (23) A meta-analysis of trials comparing longer with shorter durations of chemotherapy found a much more pronounced benefit of longer chemotherapy duration on PFS (HR = 0.75 on 9 of 13 trials) than on OS (HR = 0.93 for the same 9 trials). (24)

The difference between the median PFS and the median OS was only 4.5 months in this and other meta-analyses (Le Chevalier 2005), and therefore the gain in time from using PFS instead of OS in future trials of chemotherapy for advanced NSCLC would not be as

1  
2  
3 large as in other tumor types. (10-11) The short survival time post progression implies  
4 that differences in overall survival are likely to be observed for truly effective new  
5 treatments. (25) All in all, these findings suggest that even if PFS could be proposed as a  
6 plausible surrogate for OS from a statistical point of view, it would not be a very  
7 attractive one to evaluate the worth of conventional chemotherapies for advanced non-  
8 small cell lung cancer. The exclusion of two trials with unreliable PFS from our meta-  
9 analysis casts further doubts on the usefulness of this endpoint in advanced NSCLC, at  
10 least as measured a decade ago. Such exclusions also cast some doubts on meta-analyses  
11 that rely solely on published papers rather than on carefully reviewed individual patient  
12 data. (26)  
13  
14  
15  
16  
17  
18  
19  
20  
21  
22

23 Our analyses have several limitations. We used a pragmatic approach, using PFS as  
24 measured by the investigators in each trial, ignoring any possible differences in  
25 measurement techniques or schedules. While such differences may have an impact on  
26 PFS duration, they are unlikely to have much impact on the PFS hazard ratio. It is also  
27 unlikely that the results would have been much different, had a blinded central review of  
28 PFS been available in all trials. (27) The fact that treatment doses and schedules differed  
29 from trial to trial does not raise any particular concern. Indeed, such differences could  
30 have obscured (rather than enhanced) the relationship between treatment effects on PFS  
31 and on OS, hence the observed relationship is probably an underestimate of what would  
32 have been observed in a more homogeneous setting. More importantly, the randomized  
33 comparisons in this set of trials were between two standard combinations of cytotoxic  
34 drugs. The relationship between PFS and OS, and between treatment effects on PFS and  
35 OS, might not be the same for different cytostatic agents, or for targeted agents. Likewise,  
36 our results should not be extrapolated to today's environment, since more drugs with  
37 demonstrated activity in lung cancer are currently available than was the case in the trials  
38 analyzed here. Given the obvious advantages of using PFS as the primary endpoint in  
39 randomized trials, these issues deserve further investigation through further meta-  
40 analyses of contemporary randomized trials. (28)  
41  
42  
43  
44  
45  
46  
47  
48  
49  
50  
51  
52  
53  
54  
55  
56  
57  
58  
59  
60

## SOURCES OF FUNDING

This work was supported by an unrestricted research grant from sanofi-aventis, Paris, France, and by the Ligue Nationale Contre le Cancer, France.

## CONTRIBUTORSHIP

SL. conception and design, collection of data, data extraction, interpretation of results, revision and final approval of manuscript

PS. Data analysis, drafting the article

NB. Data extraction and monitoring

FF. collection of data, revision and final approval of manuscript

VG. collection of data, revision and final approval of manuscript

JLP. collection of data, revision and final approval of manuscript

JYD. conception, revision and final approval of manuscript

SK. collection of data, revision and final approval of manuscript

JPP. conception and design, revision and final approval of manuscript

EQ. Data analysis, drafting the article

MB. conception and design, interpretation of results, drafting and revising the article, final approval of manuscript

## DATA SHARING

There is no additional data available.

**REFERENCES**

1. Alonso A, Molenberghs G. Evaluating time to cancer recurrence as a surrogate marker for survival from an information theory perspective. *Statistical Methods in Medical Research* 17: 497-504, 2008
2. Baker SG. Two simple approaches for validating a binary surrogate endpoint using data from multiple trials. *Statistical Methods in Medical Research* 17: 505-14, 2008
3. Burzykowski T. Surrogate endpoints: wishful thinking or reality? *Statistical Methods in Medical Research* 17: 463-6, 2008
4. Chakravarty A, Sridhara R. Use of progression-free survival as a surrogate marker in oncology trials: some regulatory issues. *Statistical Methods in Medical Research* 17: 515-18, 2008
5. Green EM, Yothers G, Sargent DJ. Surrogate endpoint validation: statistical elegance versus clinical relevance. *Statistical Methods in Medical Research* 17: 477-86, 2008
6. Grothey A. Surrogate endpoints for overall survival in early colorectal cancer from the clinician's perspective. *Statistical Methods in Medical Research* 17: 529-35, 2008
7. Hughes MD. Practical issues arising in an exploratory analysis evaluating progression-free survival as a surrogate endpoint for overall survival in advanced colorectal cancer. *Statistical Methods in Medical Research* 17: 487-95, 2008
8. Piedbois P, Croswell JM. Surrogate endpoints for overall survival in advanced colorectal cancer: a clinician's perspective. *Statistical Methods in Medical Research* 17: 519-27, 2008
9. Buyse M, Burzykowski T, Michiels S, Carroll K. Individual- and trial-level surrogacy in colorectal cancer. *Statistical Methods in Medical Research* 17: 467-75, 2008
10. Buyse M, Burzykowski T, Carroll K, et al. Progression-free survival is a surrogate for survival in advanced colorectal cancer. *J Clin Oncol* 25: 5218-24, 2007
11. Burzykowski T, Buyse M, Piccart-Gebhart MJ, et al. Evaluation of tumor response, disease control, progression-free survival, and time to progression as potential surrogate end points in metastatic breast cancer. *J Clin Oncol* 26: 1987-92, 2008
12. Fossella F, Pereira JR, von Pawel J, et al. Randomized, multinational, phase III study of docetaxel plus platinum combinations versus vinorelbine plus cisplatin for

- 1  
2  
3 advanced non-small-cell lung cancer: The TAX 326 study group. *J Clin Oncol* 21:  
4 3016–3024, 2003  
5  
6  
7 13. Monnier A, Zatloukal P, Sifflerova H, et al. Docetaxel (D) versus vinorelbine–  
8 cisplatin (VC) as front-line treatment for patients with advanced non-small cell lung  
9 cancer (NSCLC) and with a normal level of serum alpha 1 acid glycoprotein (AAG):  
10 Additional data on quality of life (QOL). Preliminary results. *Proc Am Soc Clin*  
11 *Oncol* 2003 [Abstract 2680].  
12  
13  
14  
15 14. Kubota K, Watanabe K, Kunitoh H, et al. Phase III randomized trial of docetaxel plus  
16 cisplatin versus vindesine plus cisplatin in patients with stage IV non-small-cell lung  
17 cancer: The Japanese Taxotere Lung Cancer Study Group. *J Clin Oncol* 22: 254–261,  
18 2004  
19  
20  
21  
22 15. Douillard JY, Gervais R, Dabouis G, et al. Sequential two-line strategy for stage IV  
23 non-small-cell lung cancer: docetaxel–cisplatin versus vinorelbine–cisplatin followed  
24 by crossover to single-agent docetaxel or vinorelbine at progression: final results of a  
25 randomized phase II study. *Ann Oncol* 16: 81–89, 2005  
26  
27  
28  
29 16. Georgoulas V, Ardavanis A, Tsiafaki X, et al. Vinorelbine plus cisplatin versus  
30 docetaxel plus gemcitabine in advanced non-small-cell lung cancer: A phase III  
31 randomized trial. *J Clin Oncol* 23: 2937–2945, 2005  
32  
33  
34 17. Pujol JL, Breton JL, Gervais R, et al. Gemcitabine–docetaxel versus cisplatin–  
35 vinorelbine in advanced or metastatic non-small-cell lung cancer: A phase III study  
36 addressing the case for cisplatin. *Ann Oncol* 16: 602–610, 2005  
37  
38  
39 18. Kudoh S, Takeda K, Nakagawa K, et al. Phase III study of docetaxel compared with  
40 vinorelbine in elderly patients with advanced non-small-cell lung cancer: Results of  
41 the West Japan Thoracic Oncology Group Trial (WJTOG 9904). *J Clin Oncol* 24:  
42 3657–3663, 2006  
43  
44  
45 19. Douillard JY, Laporte S, Fossella F, et al. Comparison of docetaxel- and vinca  
46 alkaloid-based chemotherapy in the first-line treatment of advanced non-small cell  
47 lung cancer: a meta-analysis of seven randomized clinical trials. *J Thorac Oncol* 2:  
48 939-46, 2007  
49  
50  
51 20. Laporte S, Buyse M, Baroux N, Fossella F, et al. Meta-analysis comparing docetaxel  
52 and vinca-alkaloids in the first-line treatment of NSCLC. Comparison of results based  
53  
54  
55  
56  
57  
58  
59  
60

1  
2  
3 on individual patient data, study report data, and published data. *Eur J Cancer Suppl.*  
4  
5 1: Abstract 4, 2007  
6

- 7  
8  
9 21. Burzykowski T, Molenberghs G, Buyse M, et al: Validation of surrogate endpoints in  
10 multiple randomized clinical trials with failure-time end points. *J R Stat Soc C* 50:  
11 405-422, 2001  
12  
13 22. Burzykowski T, Buyse M. Surrogate threshold effect: an alternative measure for  
14 meta-analytic surrogate endpoint validation. *Pharmaceutical Stat* 5: 173-186, 2006  
15  
16 23. Le Chevalier T, Scagliotti G, Natale R, et al. Efficacy of gemcitabine plus platinum  
17 chemotherapy compared with other platinum containing regimens in advanced non-  
18 small-cell lung cancer: a meta-analysis of survival outcomes. *Lung Cancer* 47: 69–80,  
19 2005  
20  
21  
22 24. Soon YY, Stockler MR, Askie LM, Boyer MJ. Duration of chemotherapy for  
23 advanced non-small-cell lung cancer: a systematic review and meta-analysis of  
24 randomized trials. *J Clin Oncol* 27: 3277–3283, 2009  
25  
26  
27 25. Broglio KR, Berry DA. Detecting and overall survival benefit that is derived from  
28 progression-free survival. *J Natl Cancer Inst* 101: 1642-1649, 2009  
29  
30  
31 26. Johnson KR, Ringland C, Stodkes BJ, et al. Response rate or time to progression as  
32 predictors of survival in trials of metastatic colorectal cancer or non-small-cell lung  
33 cancer: a meta-analysis. *Lancet Oncology* 7: 741-6, 2006  
34  
35  
36 27. Amit O, Mannino F, Stone AM, et al. Blinded independent central review of  
37 progression in cancer clinical trials: Results from a meta-analysis. *Eur J Cancer*  
38 47:1772-8; 2011  
39  
40  
41 28. Soria JC, Massard C, Le Chevalier T. Should progression-free survival be the primary  
42 measure of efficacy for advanced NSCLC therapy? *Annals Oncol* 21: 2324-32, 2010  
43  
44  
45  
46  
47  
48  
49  
50  
51  
52  
53  
54  
55  
56  
57  
58  
59  
60

**Table 1.** Trials included in the surrogacy analysis (N: number of patients randomized; D, docetaxel; C, cisplatin; Cb, carboplatin; G, gemcitabine, V, vinorelbine; AUC, Area Under the Curve; HORG, Hellenic Oncology Research Group; WJTOG, West Japan Thoracic Oncology Group; q3/4 wks = every 3/4 weeks). Drug doses are indicated in mg/m<sup>2</sup> except for Cb, which was dosed to obtain an AUC of 6 mg/mL.

| Trial name  | First Author | Accrual period | N    | Follow-up (months) | Docetaxel arm                                                | Vinorelbine arm          |
|-------------|--------------|----------------|------|--------------------|--------------------------------------------------------------|--------------------------|
| Tax 326     | Fossella     | 1998-2000      | 1218 | 21                 | D 75 C 75<br>q3 wks × 6<br>or<br>D 75 Cb AUC 6<br>q3 wks × 6 | V 25 C 100<br>q4 wks × 6 |
| HORG        | Georgoulis   | 1999-2002      | 413  | 20                 | D 100 G 1000<br>q3 wks × 6*                                  | V 30 C 80<br>q3 wks × 6* |
| French      | Pujol        | 1999-2001      | 311  | 25                 | D 85 G 1000<br>q3 wks × 8                                    | V 30 C 100<br>q4 wks × 6 |
| Taxobel 303 | Douillard    | 1998-2000      | 233  | 43                 | D 75 C 100<br>q3 wks × 6                                     | V 30 C 100<br>q3 wks × 6 |
| WJTOG 9904  | Kudoh        | 2000-2003      | 180  | 26                 | D 60<br>q3 wks × 4                                           | V 25<br>q4 wks × 3       |

\* Three additional cycles were given to patients in complete or partial response after the sixth cycle



Table 2. Baseline patient characteristics for the trials listed in Table 1 (BMI: body mass index; ECOG PS: Eastern Cooperative Oncology Group Performance Status).

| <b>Trial name</b> | <b>Age in years (median, range)</b> | <b>BMI (median, range)</b> | <b>Gender (Male / Female)</b> |
|-------------------|-------------------------------------|----------------------------|-------------------------------|
| Tax 326           | 60 (23 - 87)                        | 24.3 (15.4 – 49.6)         | 73% / 27%                     |
| HORG              | 64 (36 – 78)                        | Not available              | 89% / 11%                     |
| French            | 58 (37 – 75)                        | 23.9 (15.0 – 44.1)         | 80% / 20%                     |
| Taxobel 303       | 58 (27 – 77)                        | 23.6 (15.6 – 40.0)         | 82% / 18%                     |
| WJTOG 9904        | 76 (70 – 86)                        | 20.5 (14.4 – 28.8)         | 75% / 25%                     |

  

| <b>Trial name</b> | <b>ECOG PS (% 0 / % 1 / % 2+)</b> | <b>Stage (% IIIb / % IV)</b> | <b>Squamous cell carcinoma (% Yes / % No)</b> |
|-------------------|-----------------------------------|------------------------------|-----------------------------------------------|
| Tax 326           | 16% / 80% / 4%                    | 33% / 67%                    | 33% / 67%                                     |
| HORG              | 44% / 46% / 10%                   | 38% / 62%                    | Not available                                 |
| French            | 21% / 71% / 8%                    | 16% / 84%                    | 28% / 72%                                     |
| Taxobel 303       | 31% / 54% / 15%                   | 0% / 100%                    | 33% / 67%                                     |
| WJTOG 9904        | 0% / 96% / 4%                     | 36% / 64%                    | 33% / 67%                                     |

## LEGEND TO FIGURES

**Figure 1.** Kaplan-Meier estimates of overall survival and progression-free survival by treatment arm.

**Figure 2.** Forest plot of hazard ratios for overall survival and progression-free survival.

**Figure 3.** Correlation between treatment effects (log hazard ratios) on progression-free survival (horizontal axis) and overall survival (vertical axis) in participating centers. The size of each circle is proportional to the number of patients in the corresponding center. The reference circle in black corresponds to 10 patients.

**Figure 4.** Correlation between treatment effects (log hazard ratios) on progression-free survival (horizontal axis) and overall survival (vertical axis) in prognostic strata (see text). The size of each circle is proportional to the number of patients in the corresponding stratum. The reference circle in black corresponds to 10 patients.

Figure 1

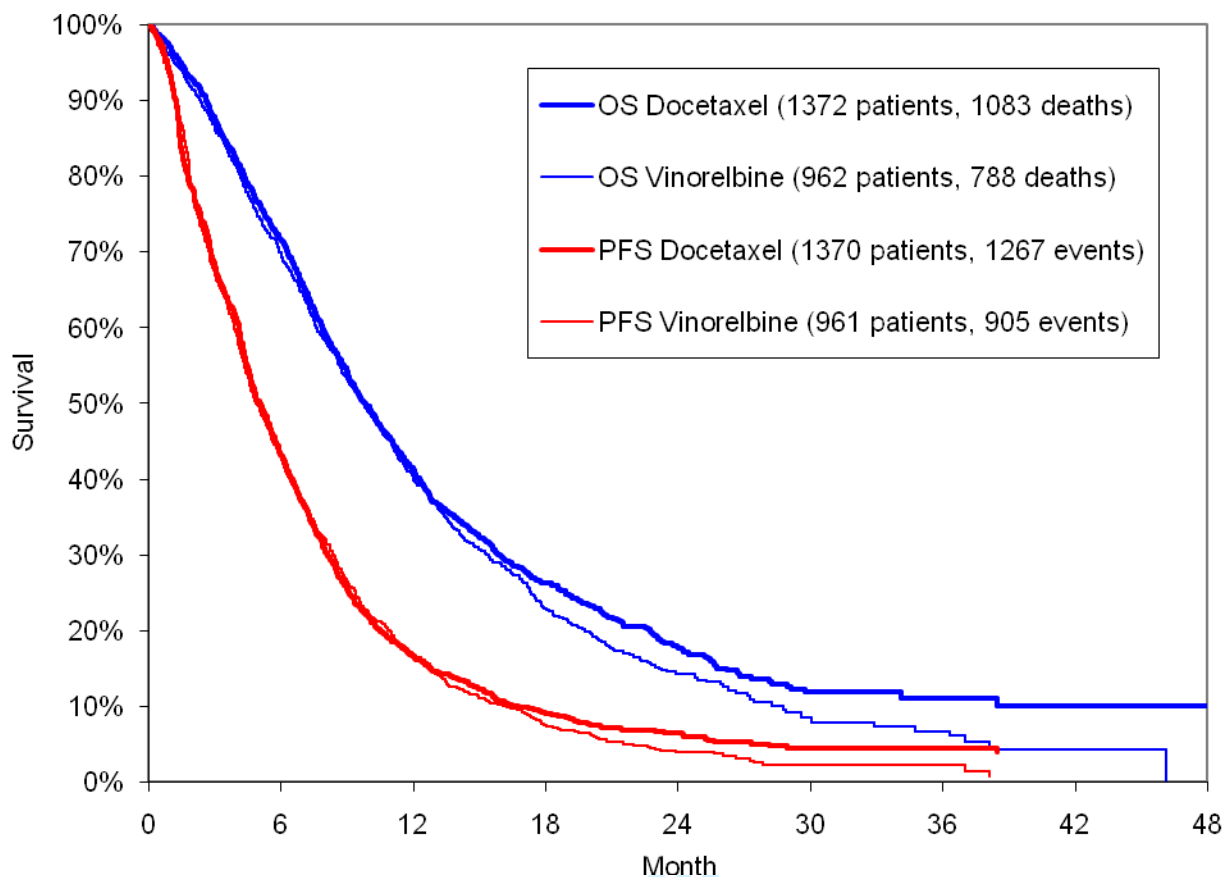

Figure 2

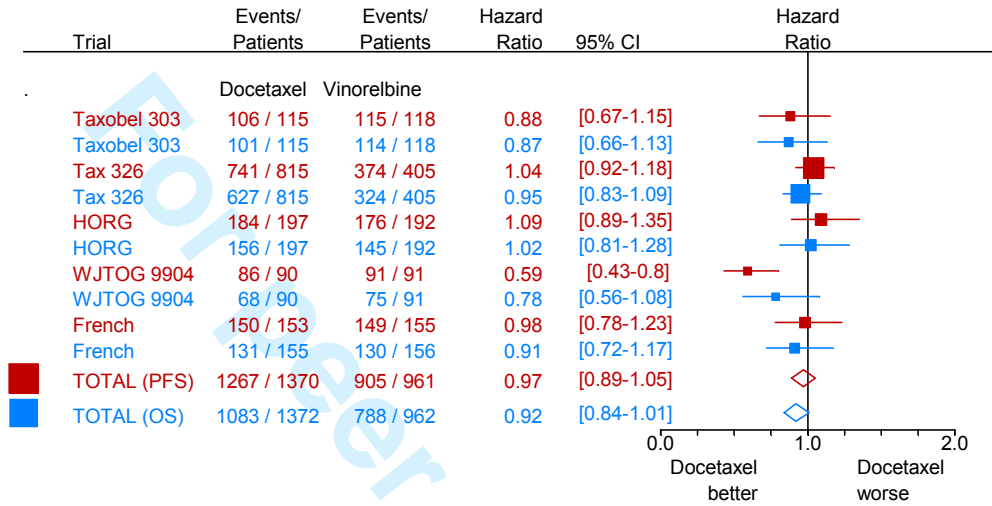

Figure 3

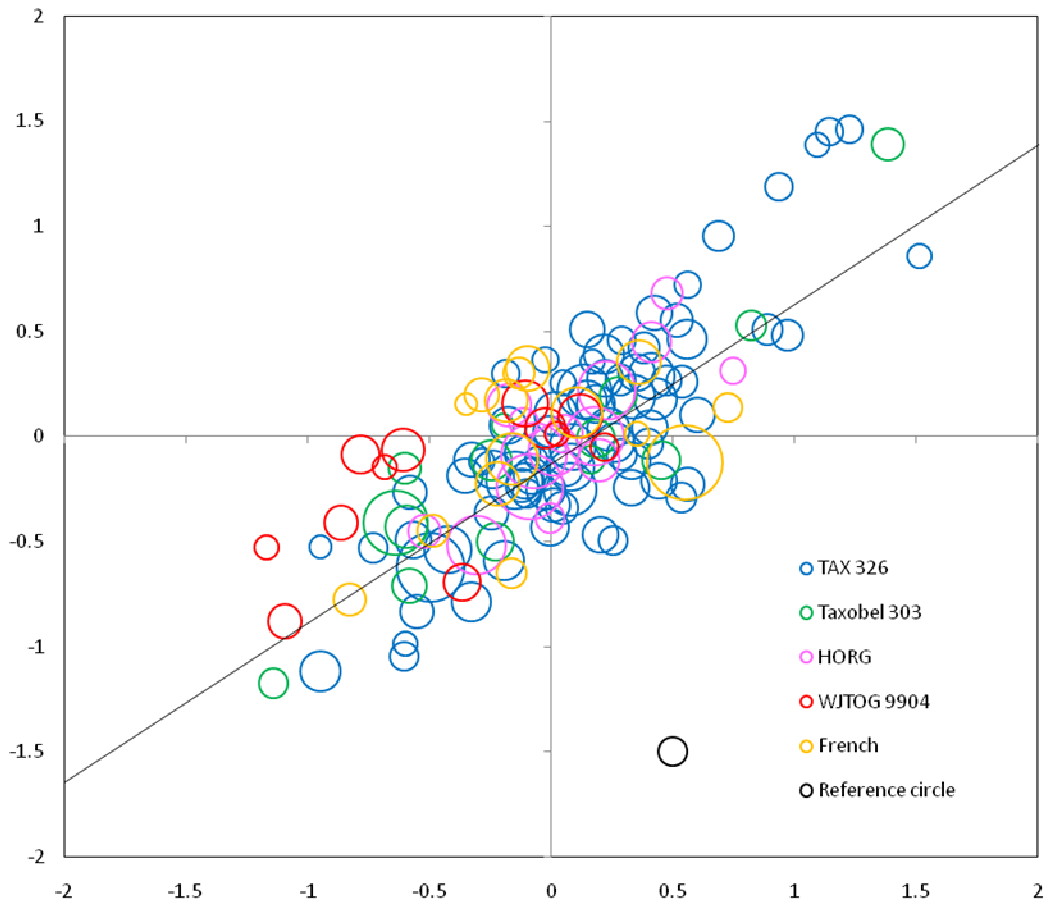

1  
2  
3  
4  
5  
6  
7  
8  
9  
10  
11  
12  
13  
14  
15  
16  
17  
18  
19  
20  
21  
22  
23  
24  
25  
26  
27  
28  
29  
30  
31  
32  
33  
34  
35  
36  
37  
38  
39  
40  
41  
42  
43  
44  
45  
46  
47  
48  
49  
50  
51  
52  
53  
54  
55  
56  
57  
58  
59  
60

Figure 4

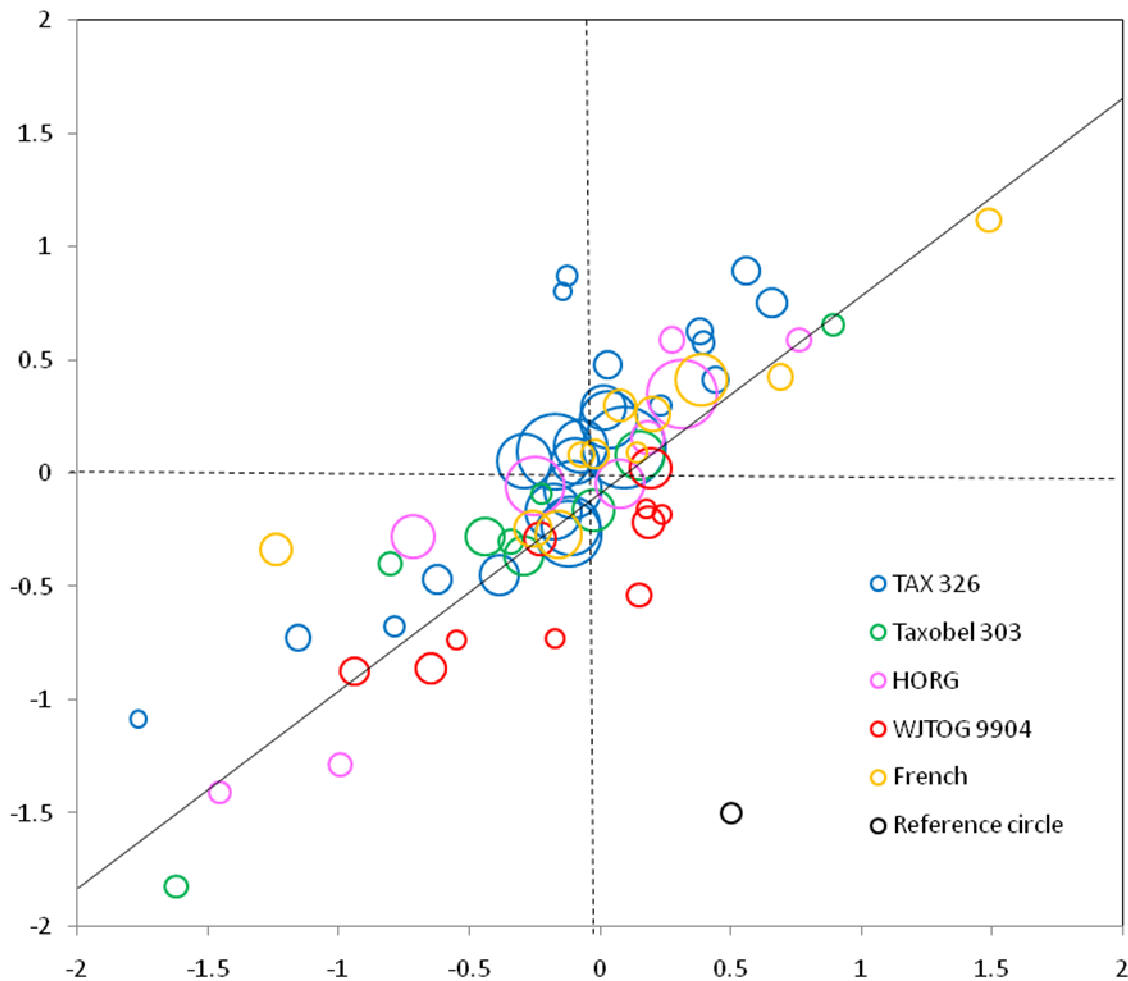

Only



**Prediction of survival benefits from progression-free survival benefits in advanced non small cell lung cancer: evidence from a pooled analysis of 2,334 patients from 5 randomized trials**

|                                 |                                                                                                                                                                                                                                                                                                                                                                                                                                                                                                                                                                |
|---------------------------------|----------------------------------------------------------------------------------------------------------------------------------------------------------------------------------------------------------------------------------------------------------------------------------------------------------------------------------------------------------------------------------------------------------------------------------------------------------------------------------------------------------------------------------------------------------------|
| Journal:                        | <i>BMJ Open</i>                                                                                                                                                                                                                                                                                                                                                                                                                                                                                                                                                |
| Manuscript ID:                  | bmjopen-2012-001802.R1                                                                                                                                                                                                                                                                                                                                                                                                                                                                                                                                         |
| Article Type:                   | Research                                                                                                                                                                                                                                                                                                                                                                                                                                                                                                                                                       |
| Date Submitted by the Author:   | 30-Jan-2013                                                                                                                                                                                                                                                                                                                                                                                                                                                                                                                                                    |
| Complete List of Authors:       | Laporte, Silvy; University Hospital of saint-Etienne, Dept. of Clinical Pharmacology<br>Squifflet, Pierre; IDDI,<br>Baroux, Noémie; ICL,<br>Fossella, Frank; University of texas, MD Anderson Cancer Center<br>Georgoulis, Vassilis; University General Hospital of Heraklion,<br>Pujol, Jean-Louis; University Hospital of Montpellier,<br>Douillard, Jean-Yves; ICO Centre René Gauducheau,<br>Kudoh, Shinzohy; Osaka City General Hospital,<br>Pignon, Jean-Pierre; Institut Gustave Roussy, Meta-Analysis Unit<br>Quineaux, Emmanuel; IDDI,<br>Buyse, Marc |
| <b>Primary Subject Heading</b>: | Oncology                                                                                                                                                                                                                                                                                                                                                                                                                                                                                                                                                       |
| Secondary Subject Heading:      | Complementary medicine, Pharmacology and therapeutics                                                                                                                                                                                                                                                                                                                                                                                                                                                                                                          |
| Keywords:                       | CLINICAL PHARMACOLOGY, Breast tumours < ONCOLOGY, Clinical trials < THERAPEUTICS                                                                                                                                                                                                                                                                                                                                                                                                                                                                               |
|                                 |                                                                                                                                                                                                                                                                                                                                                                                                                                                                                                                                                                |

1  
2  
3  
4  
5  
6  
7  
8  
9  
10  
11  
12  
13  
14  
15  
16  
17  
18  
19  
20  
21  
22  
23  
24  
25  
26  
27  
28  
29  
30  
31  
32  
33  
34  
35  
36  
37  
38  
39  
40  
41  
42  
43  
44  
45  
46  
47  
48  
49  
50  
51  
52  
53  
54  
55  
56  
57  
58  
59  
60

**Prediction of survival benefits from progression-free survival benefits in advanced non small cell lung cancer: evidence from a pooled analysis of 2,334 patients from 5 randomized trials**

Laporte S<sup>1,2</sup>, Squifflet P<sup>3</sup>, Baroux N<sup>4</sup>, Fossella F<sup>5</sup>, Georgoulas V<sup>6</sup>, Pujol JL<sup>7</sup>,  
Douillard JY<sup>8</sup>, Kudoh S<sup>9</sup>, Pignon JP<sup>10</sup>, Quinaux E<sup>3</sup>, Buyse M<sup>3,11</sup>

(1) Université Jean Monnet, Saint-Etienne, France

(2) INSERM, CIE3, Saint-Etienne, France

(3) IDDI, Louvain-la-Neuve, Belgium

(4) Institut Cancérologie de la Loire, France

(5) University of Texas MD Anderson Cancer Center, Houston, TX, USA

(6) University General Hospital of Heraklion, Heraklion, Greece

(7) University Hospital of Montpellier, France

(8) ICO Centre René Gauducheau, St Herblain, France

(9) Osaka City General Hospital, Osaka, Japan

(10) Meta-Analysis Unit, Institut Gustave Roussy, Villejuif, France

(11) Center for Statistics, Hasselt University, Diepenbeek, Belgium

**Address for correspondence and reprints:**

Marc Buyse, ScD, IDDI (International Drug Development Institute), 30 avenue Provinciale, 1340

Ottignies Louvain-la-Neuve, Belgium,

Tel: + 32 10614444, Fax: +32 10618888, marc.buyse@iddi.com

**Running head:** prediction of survival benefits in lung cancer



## ARTICLE SUMMARY

### 1) Article Focus

To investigate whether progression-free survival (PFS) can be considered a surrogate endpoint for overall survival (OS) in advanced non small cell lung cancer (NSCLC)

### 2) Key Messages

- Our analyses provide only modest support for considering PFS an acceptable surrogate for OS in patients with advanced NSCLC
- Only treatments that have a major impact on PFS (risk reduction of at least 50%) would be expected to also have a significant effect on OS

### 3) Strengths and Limitations

- Strengths : (1) analyses based on individual patient data, (2) widely accepted statistical methodology for surrogate endpoint validation
- Limitations : (1) data available on a limited number of trials, (2) results may not apply to targeted therapies

**ABSTRACT**

**Objectives.** To investigate whether progression-free survival (PFS) can be considered a surrogate endpoint for overall survival (OS) in advanced non small cell lung cancer (NSCLC).

**Design.** Meta-analysis of individual patient data from randomized trials

**Setting/Participants.** Randomized trials comparing docetaxel-based to vinorelbine-based chemotherapy for first-line treatment of NSCLC.

**Primary and secondary outcome measures:** Surrogacy of PFS for OS was assessed through the association between these endpoints and between the treatment effects on these endpoints. The surrogate threshold effect was the minimum treatment effect on PFS required to predict a non-zero treatment effect on OS.

**Results.** The median follow-up of patients still alive was 23.4 months. Median OS was 10.0 months and median PFS was 5.5 months. The treatment effects on PFS and on OS were correlated, whether using centers ( $R^2 = 0.62$ , 95% C.I. = 0.52–0.72) or prognostic strata ( $R^2 = 0.72$ , 95% C.I. = 0.60–0.84) as units of analysis. The surrogate threshold effect was a PFS hazard ratio of 0.49 using centers or 0.53 using prognostic strata.

**Conclusions.** These analyses provide only modest support for considering PFS an acceptable surrogate for OS in patients with advanced NSCLC. Only treatments that have a major impact on PFS (risk reduction of at least 50%) would be expected to also have a significant effect on OS. Whether these results also apply to targeted therapies is an open question that requires independent evaluation.

## INTRODUCTION

A surrogate endpoint is a measure that can substitute for a “final” or “true” clinical endpoint to predict patient outcomes earlier or more conveniently than with the true endpoint. The conditions required for an endpoint to be considered a valid surrogate have been intensely studied in the recent statistical literature, and whether a surrogate can ever be “validated” is still a matter of debate today. (1- 8) Two independent conditions have proven useful to explore potential surrogate endpoints in clinical settings: one stipulates that the surrogate endpoint should predict the clinical endpoint, the other that the effect of a treatment on the surrogate endpoint should predict the effect of that treatment on the true endpoint. (9)

Overall survival (OS) remains one of the most important clinical outcomes for assessing the efficacy of cancer treatments in randomized clinical trials. However, in most cases deaths occur only after prolonged follow-up, and with the increasing number of active cancer treatments, the effect of a first-line agent on OS may be confounded by subsequent therapies. Progression-free survival (PFS), measured from randomization until objective tumor progression or death, can be assessed earlier than OS, but whether it can be considered a valid surrogate for OS depends on the malignancy and the treatment under investigation. For example, OS differences can be reliably predicted from progression-free survival (PFS) differences in advanced colorectal cancer treated with fluoropyrimidines, but not in advanced breast cancer treated with anthracyclines or taxanes. (10-11)

We investigated whether PFS is an acceptable surrogate for OS in patients with advanced non-small cell lung cancer (NSCLC) using individual data from 2,334 patients enrolled in five randomized controlled trials comparing docetaxel-based with vinorelbine-based chemotherapy as first-line treatment for advanced NSCLC.

## PATIENTS AND METHODS

### ***Trials***

We analyzed data from 7 randomized controlled trials (12-18) included in a published meta-analysis of OS comparing docetaxel-based with vinca-alkaloids-based chemotherapy as first-line treatment for NSCLC. (19) Eligible trials included at least one treatment arm with either docetaxel alone or in combination with either a platinum agent (cisplatin or carboplatin) or gemcitabine and at least one vinca alkaloid-based treatment arm. Two of the seven trials included in the meta-analysis of OS could not be included in our analysis of surrogacy because the definition of PFS could not be ascertained reliably in spite of in-depth review of the case report forms. (13-14)

Table 1 provides details on the remaining five trials. The experimental arm consisted of docetaxel plus a platinum (cisplatin or carboplatin) in two trials, docetaxel plus gemcitabine in two trials, and docetaxel alone in one trial. The control arm consisted of vinorelbine plus cisplatin in four trials, and vinorelbine alone in one trial. Standard chemotherapy doses and schedules were used in the experimental and control arms.

*Table 1 here*

Table 2 shows the distribution of baseline patient characteristics in the 5 trials analyzed. The WGT OG trial only included patients  $\geq 70$  years and performance status  $\geq 1$ . (18) The Taxobel 303 trial only included stage IV patients. (15) Approximately three-quarters of the patients were male and one-third of the tumors were squamous cell carcinomas.

*Table 2 here*

### ***Data***

A first meta-analysis, based on summary data extracted from the papers describing the results of the 7 trials, suggested that docetaxel-based regimens were slightly superior to vinca-alkaloid-based regimens in terms of OS for first-line therapy of advanced NSCLC.

1  
2  
3 (19) A subsequent meta-analysis confirmed these results using individual patient data  
4 from a total of 322 centers participating in the same set of 7 trials. (20) The following  
5 data were requested for the subsequent meta-analysis: patient identifier, center identifier,  
6 randomization date, treatment assigned by randomization, age, gender, body mass index,  
7 performance status, stage, overall tumor response to the first assigned treatment, date of  
8 response, date of progression with the first allocated treatment, date of death or last visit,  
9 survival status, and cause of death if applicable.  
10  
11  
12  
13  
14  
15  
16

### 17 ***Time to Event Analyses***

18 Progression-free survival was defined as the time from random assignment to disease  
19 progression (as assessed in each individual trial) or death from any cause. Overall  
20 survival was defined as the time from random assignment to death from any cause. The  
21 distributions of PFS and OS were estimated using the Kaplan-Meier method. Treatment  
22 groups were compared using a Cox regression model. The median follow-up time was  
23 estimated using the Kaplan-Meier method with censoring for death.  
24  
25  
26  
27  
28  
29  
30  
31

### 32 ***Surrogacy Analyses***

33 A two-level modeling approach was adopted to estimate the association between PFS and  
34 OS, and between the treatment effects on these endpoints. Treatment effects were  
35 estimated as logarithms of the hazard ratio (logHR). The logHR has intuitive appeal as a  
36 measure of treatment effect: it is equal to zero in the absence of a treatment effect, and is  
37 approximately equal to the risk reduction for small treatment effects (hence a logHR of -  
38 0.10 corresponds to a risk reduction of about 10%, and a logHR of 0.10 corresponds to a  
39 risk increase of about 10%). The logHRs were estimated within units of analysis  
40 consisting of 135 centers or 64 strata. Centers were either individual centers if they had  
41 more than 3 patients per treatment arm, or groups of small centers with an average size at  
42 least equal to the average size of the big centers of the same trial (Tax 326: average size =  
43 15, Taxobel 303: average size = 17, HORG: average size = 25, WJTOG 9904: average  
44 size = 14, French: average size = 20). Strata were defined within each trial by the cross-  
45 classification of the following prognostic factors: age (<60 vs. ≥ 60 years), gender (male  
46 vs. female), performance status (ECOG 0 or 1 vs. 2 or 3), BMI (<18.5 vs. ≥ 18.5 kg/m<sup>2</sup>),  
47  
48  
49  
50  
51  
52  
53  
54  
55  
56  
57  
58  
59  
60

1  
2  
3 histology (squamous vs. non-squamous) and stage (IIIb vs. IV vs. unknown). Prognostic  
4 strata were formed as follows: a Cox model for overall survival was fit within each trial  
5 with treatment, each of the prognostic factors listed above, and the treatment-prognostic  
6 factor interaction. The prognostic factors were ordered by increasing level of significance  
7 for the treatment-prognostic factor interaction. The first prognostic factor selected in this  
8 way was the factor most predictive of the effect of treatment on overall survival, and was  
9 used to split the patients of a trial into two (or three) strata. Each of these strata was then  
10 split by the second prognostic factor; and so on. The splitting was stopped when it  
11 produced strata with less than 3 patients per treatment arm.  
12  
13  
14  
15  
16  
17  
18  
19

20  
21 The association between PFS and OS was quantified through a bivariate copula model  
22 fitted on individual patient data. Kendall's  $\tau$  was used to quantify the correlation between  
23 the endpoints. (21) A linear regression model was fitted on the estimated treatment  
24 effects on PFS and OS (logHRs for PFS and OS). Coefficients of determination (equal to  
25 squared correlation coefficients) were estimated using weighted linear regression. (21)  
26 Coefficients of determination ( $R^2$ ) quantify the proportion of variance explained by the  
27 regression. The surrogate threshold effect was defined as the minimum treatment effect  
28 on PFS required to predict a non-zero treatment effect on OS in a future trial. (22)  
29  
30  
31  
32  
33  
34  
35  
36  
37  
38

## 39 RESULTS

### 40 *Treatment Effects on PFS and OS*

41  
42 A total of 2,331 patients were included in the analysis, since the PFS and/or OS was  
43 missing for 24 (1%) of all patients. The median follow-up of patients still alive was 23.4  
44 months. For the entire cohort, the median OS was 10.0 months and the median PFS was  
45 5.5 months (Figure 1), with little difference between the curves until about 12 months.  
46  
47  
48  
49  
50  
51  
52

53 *Figure 1 here*  
54  
55  
56  
57  
58  
59  
60

1  
2  
3 The hazard ratios were 0.97 for PFS (95% C.I., 0.89 – 1.05,  $P = 0.44$ ) and 0.92 for OS  
4 (95% C.I., 0.84 – 1.01,  $P = 0.089$ ) (Figure 2). There was significant heterogeneity  
5 between the 5 trials in terms of PFS ( $P = 0.01$ ) but not in terms of OS ( $P = 0.72$ )  
6  
7  
8  
9

10  
11 *Figure 2 here*  
12

### 13 14 ***Correlation between PFS and OS***

15 PFS showed some correlation with OS ( $\tau = 0.59$ ; 95% C.I., 0.58 – 0.61).  
16  
17

### 18 19 ***Correlation Between Treatment Effects***

20 The coefficient of determination between treatment effects estimated within centers was  
21  $R^2 = 0.62$  (95% C.I. = 0.52 – 0.72). The linear regression equation was  $\log\text{HR}(\text{OS}) = -$   
22  $0.048 + 0.76 \times \log\text{HR}(\text{PFS})$  (Figure 3). Using centers as the unit of analysis, the surrogate  
23 threshold effect was a PFS hazard ratio of 0.49, indicating that a risk reduction of 51% in  
24 terms of PFS would predict a non-zero effect on OS.  
25  
26  
27  
28  
29

30  
31  
32 *Figure 3 here*  
33

34  
35 The coefficient of determination between treatment effects estimated within strata was  $R^2$   
36  $= 0.88$  (95% C.I. = 0.60 – 0.84). The linear regression equation was  $\log\text{HR}(\text{OS}) = -0.071$   
37  $+ 0.87 \times \log\text{HR}(\text{OS})$  (Figure 4). Using strata as the unit of analysis, the surrogate  
38 threshold effect was a PFS hazard ratio of 0.53, indicating that a risk reduction of 47% in  
39 terms of PFS would predict a non-zero effect on OS.  
40  
41  
42  
43  
44

45  
46  
47 *Figure 4 here*  
48  
49  
50  
51  
52  
53  
54  
55  
56  
57  
58  
59  
60

## DISCUSSION

Our analyses suggest that PFS is not a statistically acceptable surrogate endpoint for OS in patients with metastatic non-small cell lung cancer treated in first line with docetaxel-based or vinorelbine-based chemotherapies. Indeed, although about two-thirds of the treatment effects on OS are explained by the treatment effects on PFS, the surrogate threshold effect ranges from 0.49 to 0.53 depending on whether strata or centers are used as the unit of analysis, which implies that only a major benefit of some new drug on PFS (hazard reduction of about one half or greater) would be expected to also produce a non-zero benefit on OS. These analyses are quite similar whether treatment effects are estimated in the centers participating to the trials, or in the strata defined by the characteristics of the patients most predictive of survival benefits, despite the fact that the latter analysis could have overestimated the association between the treatment effects through deliberate confounding by the prognostic factors used to define the strata.

In this set of trials, docetaxel-based regimens showed a trend towards better results than vinorelbine-based regimens, but the difference was not significant for either OS (HR = 0.92,  $P = 0.089$ ) or PFS (HR = 0.97,  $P = 0.44$ ). If anything, the difference was more pronounced for OS than for PFS, an unusual finding with advanced solid tumors, for which a benefit on PFS is generally diluted to yield a smaller benefit on OS. (10-11) Other meta-analyses did not support this finding. A meta-analysis comparing gemcitabine-platinum with other platinum-containing regimens found about the same benefit of gemcitabine-platinum on PFS (HR = 0.88, information available on 14 of 17 trials) as on OS (HR = 0.91 for the same 14 trials). (23) A meta-analysis of trials comparing longer with shorter durations of chemotherapy found a much more pronounced benefit of longer chemotherapy duration on PFS (HR = 0.75 on 9 of 13 trials) than on OS (HR = 0.93 for the same 9 trials). (24)

The difference between the median PFS and the median OS was only 4.5 months in this and other meta-analyses (Le Chevalier 2005), and therefore the gain in time from using PFS instead of OS in future trials of chemotherapy for advanced NSCLC would not be as



1  
2  
3 large as in other tumor types. (10-11) The short survival time post progression implies  
4 that differences in overall survival are likely to be observed for truly effective new  
5 treatments. (25) All in all, these findings suggest that even if PFS could be proposed as a  
6 plausible surrogate for OS from a statistical point of view, it would not be a very  
7 attractive one to evaluate the worth of conventional chemotherapies for advanced non-  
8 small cell lung cancer. The exclusion of two trials with unreliable PFS from our meta-  
9 analysis casts further doubts on the usefulness of this endpoint in advanced NSCLC, at  
10 least as measured a decade ago. Such exclusions also cast some doubts on meta-analyses  
11 that rely solely on published papers rather than on carefully reviewed individual patient  
12 data. (26)  
13  
14  
15  
16  
17  
18  
19  
20  
21  
22

23 Our analyses have several limitations. We used a pragmatic approach, using PFS as  
24 measured by the investigators in each trial, ignoring any possible differences in  
25 measurement techniques or schedules. While such differences may have an impact on  
26 PFS duration, they are unlikely to have much impact on the PFS hazard ratio. It is also  
27 unlikely that the results would have been much different, had a blinded central review of  
28 PFS been available in all trials. (27) The fact that treatment doses and schedules differed  
29 from trial to trial does not raise any particular concern. Indeed, such differences could  
30 have obscured (rather than enhanced) the relationship between treatment effects on PFS  
31 and on OS, hence the observed relationship is probably an underestimate of what would  
32 have been observed in a more homogeneous setting. More importantly, the randomized  
33 comparisons in this set of trials were between two standard combinations of cytotoxic  
34 drugs. Although these analyses provide modest support for considering PFS an  
35 acceptable surrogate for OS in patients with advanced NSCLC, treatments that have a  
36 major impact on PFS would be expected to also have a significant effect on OS. The  
37 relationship between PFS and OS, and between treatment effects on PFS and OS, which  
38 might not be the same for different cytostatic agents or for targeted agents, and given the  
39 obvious advantages of using PFS as the primary endpoint in randomized trials, these  
40 issues deserve further investigation through further meta-analyses of contemporary  
41 randomized trials. (28)  
42  
43  
44  
45  
46  
47  
48  
49  
50  
51  
52  
53  
54  
55  
56  
57  
58  
59  
60

## SOURCES OF FUNDING

This work was supported by an unrestricted research grant from sanofi-aventis, Paris, France, and by the Ligue Nationale Contre le Cancer, France.

## DATA SHARING

No additional data available.

## COMPETING INTERESTS

I will upload an [ICMJE conflicts of interest form](#) for each author of this manuscript.

## CONTRIBUTORSHIP

SL. conception and design, collection of data, data extraction, interpretation of results, revision and final approval of manuscript

PS. Data analysis, drafting the article

NB. Data extraction and monitoring

FF. collection of data, revision and final approval of manuscript

VG. collection of data, revision and final approval of manuscript

JLP. collection of data, revision and final approval of manuscript

JYD. conception, revision and final approval of manuscript

SK. collection of data, revision and final approval of manuscript

JPP. conception and design, revision and final approval of manuscript

EQ. Data analysis, drafting the article

MB. conception and design, interpretation of results, drafting and revising the article, final approval of manuscript

**REFERENCES**

1. Alonso A, Molenberghs G. Evaluating time to cancer recurrence as a surrogate marker for survival from an information theory perspective. *Statistical Methods in Medical Research* 17: 497-504, 2008
2. Baker SG. Two simple approaches for validating a binary surrogate endpoint using data from multiple trials. *Statistical Methods in Medical Research* 17: 505-14, 2008
3. Burzykowski T. Surrogate endpoints: wishful thinking or reality? *Statistical Methods in Medical Research* 17: 463-6, 2008
4. Chakravarty A, Sridhara R. Use of progression-free survival as a surrogate marker in oncology trials: some regulatory issues. *Statistical Methods in Medical Research* 17: 515-18, 2008
5. Green EM, Yothers G, Sargent DJ. Surrogate endpoint validation: statistical elegance versus clinical relevance. *Statistical Methods in Medical Research* 17: 477-86, 2008
6. Grothey A. Surrogate endpoints for overall survival in early colorectal cancer from the clinician's perspective. *Statistical Methods in Medical Research* 17: 529-35, 2008
7. Hughes MD. Practical issues arising in an exploratory analysis evaluating progression-free survival as a surrogate endpoint for overall survival in advanced colorectal cancer. *Statistical Methods in Medical Research* 17: 487-95, 2008
8. Piedbois P, Croswell JM. Surrogate endpoints for overall survival in advanced colorectal cancer: a clinician's perspective. *Statistical Methods in Medical Research* 17: 519-27, 2008
9. Buyse M, Burzykowski T, Michiels S, et al. Individual- and trial-level surrogacy in colorectal cancer. *Statistical Methods in Medical Research* 17: 467-75, 2008
10. Buyse M, Burzykowski T, Carroll K, et al. Progression-free survival is a surrogate for survival in advanced colorectal cancer. *J Clin Oncol* 25: 5218-24, 2007
11. Burzykowski T, Buyse M, Piccart-Gebhart MJ, et al. Evaluation of tumor response, disease control, progression-free survival, and time to progression as potential surrogate end points in metastatic breast cancer. *J Clin Oncol* 26: 1987-92, 2008
12. Fossella F, Pereira JR, von Pawel J, et al. Randomized, multinational, phase III study of docetaxel plus platinum combinations versus vinorelbine plus cisplatin for

- 1  
2  
3 advanced non-small-cell lung cancer: The TAX 326 study group. *J Clin Oncol* 21:  
4 3016–3024, 2003  
5  
6  
7 13. Monnier A, Zatloukal P, Sifflerova H, et al. Docetaxel (D) versus vinorelbine–  
8 cisplatin (VC) as front-line treatment for patients with advanced non-small cell lung  
9 cancer (NSCLC) and with a normal level of serum alpha 1 acid glycoprotein (AAG):  
10 Additional data on quality of life (QOL). Preliminary results. *Proc Am Soc Clin*  
11 *Oncol* 2003 [Abstract 2680].  
12  
13  
14  
15  
16 14. Kubota K, Watanabe K, Kunitoh H, et al. Phase III randomized trial of docetaxel plus  
17 cisplatin versus vindesine plus cisplatin in patients with stage IV non-small-cell lung  
18 cancer: The Japanese Taxotere Lung Cancer Study Group. *J Clin Oncol* 22: 254–261,  
19 2004  
20  
21  
22  
23 15. Douillard JY, Gervais R, Dabouis G, et al. Sequential two-line strategy for stage IV  
24 non-small-cell lung cancer: docetaxel–cisplatin versus vinorelbine–cisplatin followed  
25 by crossover to single-agent docetaxel or vinorelbine at progression: final results of a  
26 randomized phase II study. *Ann Oncol* 16: 81–89, 2005  
27  
28  
29  
30 16. Georgoulas V, Ardavanis A, Tsiadaki X, et al. Vinorelbine plus cisplatin versus  
31 docetaxel plus gemcitabine in advanced non-small-cell lung cancer: A phase III  
32 randomized trial. *J Clin Oncol* 23: 2937–2945, 2005  
33  
34  
35  
36 17. Pujol JL, Breton JL, Gervais R, et al. Gemcitabine–docetaxel versus cisplatin–  
37 vinorelbine in advanced or metastatic non-small-cell lung cancer: A phase III study  
38 addressing the case for cisplatin. *Ann Oncol* 16: 602–610, 2005  
39  
40  
41 18. Kudoh S, Takeda K, Nakagawa K, et al. Phase III study of docetaxel compared with  
42 vinorelbine in elderly patients with advanced non-small-cell lung cancer: Results of  
43 the West Japan Thoracic Oncology Group Trial (WJTOG 9904). *J Clin Oncol* 24:  
44 3657–3663, 2006  
45  
46  
47  
48 19. Douillard JY, Laporte S, Fossella F, et al. Comparison of docetaxel- and vinca  
49 alkaloid-based chemotherapy in the first-line treatment of advanced non-small cell  
50 lung cancer: a meta-analysis of seven randomized clinical trials. *J Thorac Oncol* 2:  
51 939-46, 2007  
52  
53  
54  
55 20. Laporte S, Buyse M, Baroux N, et al. Meta-analysis comparing docetaxel and vinca-  
56 alkaloids in the first-line treatment of NSCLC. Comparison of results based on  
57  
58  
59  
60

1  
2  
3 individual patient data, study report data, and published data. *Eur J Cancer Suppl.* 1:  
4 Abstract 4, 2007  
5

- 6  
7 21. Burzykowski T, Molenberghs G, Buyse M, et al: Validation of surrogate endpoints in  
8 multiple randomized clinical trials with failure-time end points. *J R Stat Soc C* 50:  
9 405-422, 2001  
10  
11 22. Burzykowski T, Buyse M. Surrogate threshold effect: an alternative measure for  
12 meta-analytic surrogate endpoint validation. *Pharmaceutical Stat* 5: 173-186, 2006  
13  
14 23. Le Chevalier T, Scagliotti G, Natale R, et al. Efficacy of gemcitabine plus platinum  
15 chemotherapy compared with other platinum containing regimens in advanced non-  
16 small-cell lung cancer: a meta-analysis of survival outcomes. *Lung Cancer* 47: 69–80,  
17 2005  
18  
19 24. Soon YY, Stockler MR, Askie LM, et al. Duration of chemotherapy for advanced  
20 non-small-cell lung cancer: a systematic review and meta-analysis of randomized  
21 trials. *J Clin Oncol* 27: 3277–3283, 2009  
22  
23 25. Broglio KR, Berry DA. Detecting and overall survival benefit that is derived from  
24 progression-free survival. *J Natl Cancer Inst* 101: 1642-1649, 2009  
25  
26 26. Johnson KR, Ringland C, Stodkes BJ, et al. Response rate or time to progression as  
27 predictors of survival in trials of metastatic colorectal cancer or non-small-cell lung  
28 cancer: a meta-analysis. *Lancet Oncology* 7: 741-6, 2006  
29  
30 27. Amit O, Mannino F, Stone AM, et al. Blinded independent central review of  
31 progression in cancer clinical trials: Results from a meta-analysis. *Eur J Cancer*  
32 47:1772-8; 2011  
33  
34 28. Soria JC, Massard C, Le Chevalier T. Should progression-free survival be the primary  
35 measure of efficacy for advanced NSCLC therapy? *Annals Oncol* 21: 2324-32, 2010  
36  
37  
38  
39  
40  
41  
42  
43  
44  
45  
46  
47  
48  
49  
50  
51  
52  
53  
54  
55  
56  
57  
58  
59  
60

**Table 1.** Trials included in the surrogacy analysis (N: number of patients randomized; D, docetaxel; C, cisplatin; Cb, carboplatin; G, gemcitabine, V, vinorelbine; AUC, Area Under the Curve; HORG, Hellenic Oncology Research Group; WJTOG, West Japan Thoracic Oncology Group; q3/4 wks = every 3/4 weeks). Drug doses are indicated in mg/m<sup>2</sup> except for Cb, which was dosed to obtain an AUC of 6 mg/mL.

| Trial name  | First Author | Accrual period | N    | Follow-up (months) | Docetaxel arm                                                | Vinorelbine arm          |
|-------------|--------------|----------------|------|--------------------|--------------------------------------------------------------|--------------------------|
| Tax 326     | Fossella     | 1998-2000      | 1218 | 21                 | D 75 C 75<br>q3 wks × 6<br>or<br>D 75 Cb AUC 6<br>q3 wks × 6 | V 25 C 100<br>q4 wks × 6 |
| HORG        | Georgoulis   | 1999-2002      | 413  | 20                 | D 100 G 1000<br>q3 wks × 6*                                  | V 30 C 80<br>q3 wks × 6* |
| French      | Pujol        | 1999-2001      | 311  | 25                 | D 85 G 1000<br>q3 wks × 8                                    | V 30 C 100<br>q4 wks × 6 |
| Taxobel 303 | Douillard    | 1998-2000      | 233  | 43                 | D 75 C 100<br>q3 wks × 6                                     | V 30 C 100<br>q3 wks × 6 |
| WJTOG 9904  | Kudoh        | 2000-2003      | 180  | 26                 | D 60<br>q3 wks × 4                                           | V 25<br>q4 wks × 3       |

\* Three additional cycles were given to patients in complete or partial response after the sixth cycle

Table 2. Baseline patient characteristics for the trials listed in Table 1 (BMI: body mass index; ECOG PS: Eastern Cooperative Oncology Group Performance Status).

| <b>Trial name</b> | <b>Age in years (median, range)</b> | <b>BMI (median, range)</b> | <b>Gender (Male / Female)</b> |
|-------------------|-------------------------------------|----------------------------|-------------------------------|
| Tax 326           | 60 (23 - 87)                        | 24.3 (15.4 – 49.6)         | 73% / 27%                     |
| HORG              | 64 (36 – 78)                        | Not available              | 89% / 11%                     |
| French            | 58 (37 – 75)                        | 23.9 (15.0 – 44.1)         | 80% / 20%                     |
| Taxobel 303       | 58 (27 – 77)                        | 23.6 (15.6 – 40.0)         | 82% / 18%                     |
| WJTOG 9904        | 76 (70 – 86)                        | 20.5 (14.4 – 28.8)         | 75% / 25%                     |

  

| <b>Trial name</b> | <b>ECOG PS (% 0 / % 1 / % 2+)</b> | <b>Stage (% IIIb / % IV)</b> | <b>Squamous cell carcinoma (% Yes / % No)</b> |
|-------------------|-----------------------------------|------------------------------|-----------------------------------------------|
| Tax 326           | 16% / 80% / 4%                    | 33% / 67%                    | 33% / 67%                                     |
| HORG              | 44% / 46% / 10%                   | 38% / 62%                    | Not available                                 |
| French            | 21% / 71% / 8%                    | 16% / 84%                    | 28% / 72%                                     |
| Taxobel 303       | 31% / 54% / 15%                   | 0% / 100%                    | 33% / 67%                                     |
| WJTOG 9904        | 0% / 96% / 4%                     | 36% / 64%                    | 33% / 67%                                     |

## LEGEND TO FIGURES

**Figure 1.** Kaplan-Meier estimates of overall survival and progression-free survival by treatment arm.

**Figure 2.** Forest plot of hazard ratios for overall survival and progression-free survival.

**Figure 3.** Correlation between treatment effects (log hazard ratios) on progression-free survival (horizontal axis) and overall survival (vertical axis) in participating centers. The size of each circle is proportional to the number of patients in the corresponding center. The reference circle in black corresponds to 10 patients.

**Figure 4.** Correlation between treatment effects (log hazard ratios) on progression-free survival (horizontal axis) and overall survival (vertical axis) in prognostic strata (see text). The size of each circle is proportional to the number of patients in the corresponding stratum. The reference circle in black corresponds to 10 patients.



1  
2  
3  
4  
5  
6  
7  
8  
9  
10  
11  
12  
13  
14  
15  
16  
17  
18  
19  
20  
21  
22  
23  
24  
25  
26  
27  
28  
29  
30  
31  
32  
33  
34  
35  
36  
37  
38  
39  
40  
41  
42  
43  
44  
45  
46  
47  
48  
49  
50  
51  
52  
53  
54  
55  
56  
57  
58  
59  
60

**Prediction of survival benefits from progression-free survival benefits in advanced non small cell lung cancer: evidence from a pooled analysis of 2,334 patients from 5 randomized trials**

Laporte S<sup>1,2</sup>, Squifflet P<sup>3</sup>, Baroux N<sup>4</sup>, Fossella F<sup>5</sup>, Georgoulas V<sup>6</sup>, Pujol JL<sup>7</sup>, Douillard JY<sup>8</sup>, Kudoh S<sup>9</sup>, Pignon JP<sup>10</sup>, Quinaux E<sup>3</sup>, Buyse M<sup>3,11</sup>

(1) Université Jean Monnet, Saint-Etienne, France

(2) INSERM, CIE3, Saint-Etienne, France

(3) IDDI, Louvain-la-Neuve, Belgium

(4) Institut Cancérologie de la Loire, France

(5) University of Texas MD Anderson Cancer Center, Houston, TX, USA

(6) University General Hospital of Heraklion, Heraklion, Greece

(7) University Hospital of Montpellier, France

(8) ICO Centre René Gauducheau, St Herblain, France

(9) Osaka City General Hospital, Osaka, Japan

(10) Meta-Analysis Unit, Institut Gustave Roussy, Villejuif, France

(11) Center for Statistics, Hasselt University, Diepenbeek, Belgium

**Address for correspondence and reprints:**

Marc Buyse, ScD, IDDI (International Drug Development Institute), 30 avenue Provinciale, 1340

Ottignies Louvain-la-Neuve, Belgium,

Tel: + 32 10614444, Fax: +32 10618888, marc.buyse@iddi.com

**Running head:** prediction of survival benefits in lung cancer

## ARTICLE SUMMARY

### 1) Article Focus

To investigate whether progression-free survival (PFS) can be considered a surrogate endpoint for overall survival (OS) in advanced non small cell lung cancer (NSCLC)

### 2) Key Messages

- Our analyses provide only modest support for considering PFS an acceptable surrogate for OS in patients with advanced NSCLC
- Only treatments that have a major impact on PFS (risk reduction of at least 50%) would be expected to also have a significant effect on OS

### 3) Strengths and Limitations

- Strengths : (1) analyses based on individual patient data, (2) widely accepted statistical methodology for surrogate endpoint validation
- Limitations : (1) data available on a limited number of trials, (2) results may not apply to targeted therapies

## ABSTRACT

**Objectives.** To investigate whether progression-free survival (PFS) can be considered a surrogate endpoint for overall survival (OS) in advanced non small cell lung cancer (NSCLC).

**Design.** Meta-analysis of individual patient data from randomized trials

**Setting/Participants.** Randomized trials comparing docetaxel-based to vinorelbine-based chemotherapy for first-line treatment of NSCLC.

**Primary and secondary outcome measures:** Surrogacy of PFS for OS was assessed through the association between these endpoints and between the treatment effects on these endpoints. The surrogate threshold effect was the minimum treatment effect on PFS required to predict a non-zero treatment effect on OS.

**Results.** The median follow-up of patients still alive was 23.4 months. Median OS was 10.0 months and median PFS was 5.5 months. The treatment effects on PFS and on OS were correlated, whether using centers ( $R^2 = 0.62$ , 95% C.I. = 0.52–0.72) or prognostic strata ( $R^2 = 0.72$ , 95% C.I. = 0.60–0.84) as units of analysis. The surrogate threshold effect was a PFS hazard ratio of 0.49 using centers or 0.53 using prognostic strata.

**Conclusions.** These analyses provide only modest support for considering PFS an acceptable surrogate for OS in patients with advanced NSCLC. Only treatments that have a major impact on PFS (risk reduction of at least 50%) would be expected to also have a significant effect on OS. Whether these results also apply to targeted therapies is an open question that requires independent evaluation.

There is no additional data available.

## INTRODUCTION

A surrogate endpoint is a measure that can substitute for a “final” or “true” clinical endpoint to predict patient outcomes earlier or more conveniently than with the true endpoint. The conditions required for an endpoint to be considered a valid surrogate have been intensely studied in the recent statistical literature, and whether a surrogate can ever be “validated” is still a matter of debate today. (1- 8) Two independent conditions have proven useful to explore potential surrogate endpoints in clinical settings: one stipulates that the surrogate endpoint should predict the clinical endpoint, the other that the effect of a treatment on the surrogate endpoint should predict the effect of that treatment on the true endpoint. (9)

Overall survival (OS) remains one of the most important clinical outcomes for assessing the efficacy of cancer treatments in randomized clinical trials. However, in most cases deaths occur only after prolonged follow-up, and with the increasing number of active cancer treatments, the effect of a first-line agent on OS may be confounded by subsequent therapies. Progression-free survival (PFS), measured from randomization until objective tumor progression or death, can be assessed earlier than OS, but whether it can be considered a valid surrogate for OS depends on the malignancy and the treatment under investigation. For example, OS differences can be reliably predicted from progression-free survival (PFS) differences in advanced colorectal cancer treated with fluoropyrimidines, but not in advanced breast cancer treated with anthracyclines or taxanes. (10-11)

We investigated whether PFS is an acceptable surrogate for OS in patients with advanced non-small cell lung cancer (NSCLC) using individual data from 2,334 patients enrolled in five randomized controlled trials comparing docetaxel-based with vinorelbine-based chemotherapy as first-line treatment for advanced NSCLC.

## PATIENTS AND METHODS

### ***Trials***

We analyzed data from 7 randomized controlled trials (12-18) included in a published meta-analysis of OS comparing docetaxel-based with vinca-alkaloids-based chemotherapy as first-line treatment for NSCLC. (19) Eligible trials included at least one treatment arm with either docetaxel alone or in combination with either a platinum agent (cisplatin or carboplatin) or gemcitabine and at least one vinca alkaloid-based treatment arm. Two of the seven trials included in the meta-analysis of OS could not be included in our analysis of surrogacy because the definition of PFS could not be ascertained reliably in spite of in-depth review of the case report forms. (13-14)

Table 1 provides details on the remaining five trials. The experimental arm consisted of docetaxel plus a platinum (cisplatin or carboplatin) in two trials, docetaxel plus gemcitabine in two trials, and docetaxel alone in one trial. The control arm consisted of vinorelbine plus cisplatin in four trials, and vinorelbine alone in one trial. Standard chemotherapy doses and schedules were used in the experimental and control arms.

*Table 1 here*

Table 2 shows the distribution of baseline patient characteristics in the 5 trials analyzed. The WGTOG trial only included patients  $\geq 70$  years and performance status  $\geq 1$ . (18) The Taxobel 303 trial only included stage IV patients. (15) Approximately three-quarters of the patients were male and one-third of the tumors were squamous cell carcinomas.

*Table 2 here*

### ***Data***

A first meta-analysis, based on summary data extracted from the papers describing the results of the 7 trials, suggested that docetaxel-based regimens were slightly superior to vinca-alkaloid-based regimens in terms of OS for first-line therapy of advanced NSCLC.

1  
2  
3 (19) A subsequent meta-analysis confirmed these results using individual patient data  
4 from a total of 322 centers participating in the same set of 7 trials. (20) The following  
5 data were requested for the subsequent meta-analysis: patient identifier, center identifier,  
6 randomization date, treatment assigned by randomization, age, gender, body mass index,  
7 performance status, stage, overall tumor response to the first assigned treatment, date of  
8 response, date of progression with the first allocated treatment, date of death or last visit,  
9 survival status, and cause of death if applicable.  
10  
11  
12  
13  
14  
15  
16

### 17 *Time to Event Analyses*

18 Progression-free survival was defined as the time from random assignment to disease  
19 progression (as assessed in each individual trial) or death from any cause. Overall  
20 survival was defined as the time from random assignment to death from any cause. The  
21 distributions of PFS and OS were estimated using the Kaplan-Meier method. Treatment  
22 groups were compared using a Cox regression model. The median follow-up time was  
23 estimated using the Kaplan-Meier method with censoring for death.  
24  
25  
26  
27  
28  
29  
30  
31

### 32 *Surrogacy Analyses*

33 A two-level modeling approach was adopted to estimate the association between PFS and  
34 OS, and between the treatment effects on these endpoints. Treatment effects were  
35 estimated as logarithms of the hazard ratio (logHR). The logHR has intuitive appeal as a  
36 measure of treatment effect: it is equal to zero in the absence of a treatment effect, and is  
37 approximately equal to the risk reduction for small treatment effects (hence a logHR of -  
38 0.10 corresponds to a risk reduction of about 10%, and a logHR of 0.10 corresponds to a  
39 risk increase of about 10%). The logHRs were estimated within units of analysis  
40 consisting of 135 centers or 64 strata. Centers were either individual centers if they had  
41 more than 3 patients per treatment arm, or groups of small centers with an average size at  
42 least equal to the average size of the big centers of the same trial (Tax 326: average size =  
43 15, Taxobel 303: average size = 17, HORG: average size = 25, WJTOG 9904: average  
44 size = 14, French: average size = 20). Strata were defined within each trial by the cross-  
45 classification of the following prognostic factors: age (<60 vs. ≥ 60 years), gender (male  
46 vs. female), performance status (ECOG 0 or 1 vs. 2 or 3), BMI (<18.5 vs. ≥ 18.5 kg/m<sup>2</sup>),  
47  
48  
49  
50  
51  
52  
53  
54  
55  
56  
57  
58  
59  
60

1  
2  
3 histology (squamous vs. non-squamous) and stage (IIIb vs. IV vs. unknown). Prognostic  
4 strata were formed as follows: a Cox model for overall survival was fit within each trial  
5 with treatment, each of the prognostic factors listed above, and the treatment-prognostic  
6 factor interaction. The prognostic factors were ordered by increasing level of significance  
7 for the treatment-prognostic factor interaction. The first prognostic factor selected in this  
8 way was the factor most predictive of the effect of treatment on overall survival, and was  
9 used to split the patients of a trial into two (or three) strata. Each of these strata was then  
10 split by the second prognostic factor; and so on. The splitting was stopped when it  
11 produced strata with less than 3 patients per treatment arm.  
12  
13  
14  
15  
16  
17  
18  
19

20  
21 The association between PFS and OS was quantified through a bivariate copula model  
22 fitted on individual patient data. Kendall's  $\tau$  was used to quantify the correlation between  
23 the endpoints. (21) A linear regression model was fitted on the estimated treatment  
24 effects on PFS and OS (logHRs for PFS and OS). Coefficients of determination (equal to  
25 squared correlation coefficients) were estimated using weighted linear regression. (21)  
26 Coefficients of determination ( $R^2$ ) quantify the proportion of variance explained by the  
27 regression. The surrogate threshold effect was defined as the minimum treatment effect  
28 on PFS required to predict a non-zero treatment effect on OS in a future trial. (22)  
29  
30  
31  
32  
33  
34  
35  
36  
37  
38

## 39 RESULTS

### 40 *Treatment Effects on PFS and OS*

41  
42  
43 A total of 2,334-331 patients were included in the analysis, since the PFS and/or OS was  
44 missing for 24 (1%) of all patients. The median follow-up of patients still alive was 23.4  
45 months. For the entire cohort, the median OS was 10.0 months and the median PFS was  
46 5.5 months (Figure 1), with little difference between the curves until about 12 months.  
47  
48  
49  
50  
51  
52

53 *Figure 1 here*  
54  
55  
56  
57  
58  
59  
60

1  
2  
3 The hazard ratios were 0.97 for PFS (95% C.I., 0.89 – 1.05,  $P = 0.44$ ) and 0.92 for OS  
4 (95% C.I., 0.84 – 1.01,  $P = 0.089$ ) (Figure 2). There was significant heterogeneity  
5 between the 5 trials in terms of PFS ( $P = 0.01$ ) but not in terms of OS ( $P = 0.72$ )  
6  
7  
8  
9

10  
11 *Figure 2 here*  
12

### 13 14 ***Correlation between PFS and OS***

15 PFS showed some correlation with OS ( $\tau = 0.59$ ; 95% C.I., 0.58 – 0.61).  
16  
17

### 18 19 ***Correlation Between Treatment Effects***

20 The coefficient of determination between treatment effects estimated within centers was  
21  $R^2 = 0.62$  (95% C.I. = 0.52 – 0.72). The linear regression equation was  $\log\text{HR}(\text{OS}) = -$   
22  $0.048 + 0.76 \times \log\text{HR}(\text{PFS})$  (Figure 3). Using centers as the unit of analysis, the surrogate  
23 threshold effect was a PFS hazard ratio of 0.49, indicating that a risk reduction of 51% in  
24 terms of PFS would predict a non-zero effect on OS.  
25  
26  
27  
28  
29

30  
31  
32 *Figure 3 here*  
33

34  
35 The coefficient of determination between treatment effects estimated within strata was  $R^2$   
36  $= 0.88$  (95% C.I. = 0.60 – 0.84). The linear regression equation was  $\log\text{HR}(\text{OS}) = -0.071$   
37  $+ 0.87 \times \log\text{HR}(\text{OS})$  (Figure 4). Using strata as the unit of analysis, the surrogate  
38 threshold effect was a PFS hazard ratio of 0.53, indicating that a risk reduction of 47% in  
39 terms of PFS would predict a non-zero effect on OS.  
40  
41  
42  
43  
44

45  
46  
47 *Figure 4 here*  
48  
49  
50  
51  
52  
53  
54  
55  
56  
57  
58  
59  
60



## DISCUSSION

Our analyses suggest that PFS is not a statistically acceptable surrogate endpoint for OS in patients with metastatic non-small cell lung cancer treated in first line with docetaxel-based or vinorelbine-based chemotherapies. Indeed, although about two-thirds of the treatment effects on OS are explained by the treatment effects on PFS, the surrogate threshold effect ranges from 0.49 to 0.53 depending on whether strata or centers are used as the unit of analysis, which implies that only a major benefit of some new drug on PFS (hazard reduction of about one half or greater) would be expected to also produce a non-zero benefit on OS. These analyses are quite similar whether treatment effects are estimated in the centers participating to the trials, or in the strata defined by the characteristics of the patients most predictive of survival benefits, despite the fact that the latter analysis could have overestimated the association between the treatment effects through deliberate confounding by the prognostic factors used to define the strata.

In this set of trials, docetaxel-based regimens showed a trend towards better results than vinorelbine-based regimens, but the difference was not significant for either OS (HR = 0.92,  $P = 0.089$ ) or PFS (HR = 0.97,  $P = 0.44$ ). If anything, the difference was more pronounced for OS than for PFS, an unusual finding with advanced solid tumors, for which a benefit on PFS is generally diluted to yield a smaller benefit on OS. (10-11) Other meta-analyses did not support this finding. A meta-analysis comparing gemcitabine-platinum with other platinum-containing regimens found about the same benefit of gemcitabine-platinum on PFS (HR = 0.88, information available on 14 of 17 trials) as on OS (HR = 0.91 for the same 14 trials). (23) A meta-analysis of trials comparing longer with shorter durations of chemotherapy found a much more pronounced benefit of longer chemotherapy duration on PFS (HR = 0.75 on 9 of 13 trials) than on OS (HR = 0.93 for the same 9 trials). (24)

The difference between the median PFS and the median OS was only 4.5 months in this and other meta-analyses (Le Chevalier 2005), and therefore the gain in time from using PFS instead of OS in future trials of chemotherapy for advanced NSCLC would not be as

1  
2  
3 large as in other tumor types. (10-11) The short survival time post progression implies  
4 that differences in overall survival are likely to be observed for truly effective new  
5 treatments. (25) All in all, these findings suggest that even if PFS could be proposed as a  
6 plausible surrogate for OS from a statistical point of view, it would not be a very  
7 attractive one to evaluate the worth of conventional chemotherapies for advanced non-  
8 small cell lung cancer. The exclusion of two trials with unreliable PFS from our meta-  
9 analysis casts further doubts on the usefulness of this endpoint in advanced NSCLC, at  
10 least as measured a decade ago. Such exclusions also cast some doubts on meta-analyses  
11 that rely solely on published papers rather than on carefully reviewed individual patient  
12 data. (26)  
13  
14  
15  
16  
17  
18  
19  
20  
21

22  
23 Our analyses have several limitations. We used a pragmatic approach, using PFS as  
24 measured by the investigators in each trial, ignoring any possible differences in  
25 measurement techniques or schedules. While such differences may have an impact on  
26 PFS duration, they are unlikely to have much impact on the PFS hazard ratio. It is also  
27 unlikely that the results would have been much different, had a blinded central review of  
28 PFS been available in all trials. (27) The fact that treatment doses and schedules differed  
29 from trial to trial does not raise any particular concern. Indeed, such differences could  
30 have obscured (rather than enhanced) the relationship between treatment effects on PFS  
31 and on OS, hence the observed relationship is probably an underestimate of what would  
32 have been observed in a more homogeneous setting. More importantly, the randomized  
33 comparisons in this set of trials were between two standard combinations of cytotoxic  
34 drugs. Although these analyses provide modest support for considering PFS an  
35 acceptable surrogate for OS in patients with advanced NSCLC, treatments that have a  
36 major impact on PFS would be expected to also have a significant effect on OS. The  
37 relationship between PFS and OS, and between treatment effects on PFS and OS, which  
38 might not be the same for different cytostatic agents or for targeted agents, and given the  
39 obvious advantages of using PFS as the primary endpoint in randomized trials, these  
40 issues deserve further investigation through further meta-analyses of contemporary  
41 randomized trials. (28)~~The relationship between PFS and OS, and between treatment~~  
42 ~~effects on PFS and OS, might not be the same for different cytostatic agents, or for~~  
43  
44  
45  
46  
47  
48  
49  
50  
51  
52  
53  
54  
55  
56  
57  
58  
59  
60

1  
2  
3  
4  
5  
6  
7  
8  
9  
10  
11  
12  
13  
14  
15  
16  
17  
18  
19  
20  
21  
22  
23  
24  
25  
26  
27  
28  
29  
30  
31  
32  
33  
34  
35  
36  
37  
38  
39  
40  
41  
42  
43  
44  
45  
46  
47  
48  
49  
50  
51  
52  
53  
54  
55  
56  
57  
58  
59  
60

~~targeted agents. Likewise, our results should not be extrapolated to today's environment, since more drugs with demonstrated activity in lung cancer are currently available than was the case in the trials analyzed here. Given the obvious advantages of using PFS as the primary endpoint in randomized trials, these issues deserve further investigation through further meta-analyses of contemporary randomized trials. (28)~~

## SOURCES OF FUNDING

This work was supported by an unrestricted research grant from sanofi-aventis, Paris, France, and by the Ligue Nationale Contre le Cancer, France.

## REFERENCES

1. Alonso A, Molenberghs G. Evaluating time to cancer recurrence as a surrogate marker for survival from an information theory perspective. *Statistical Methods in Medical Research* 17: 497-504, 2008
2. Baker SG. Two simple approaches for validating a binary surrogate endpoint using data from multiple trials. *Statistical Methods in Medical Research* 17: 505-14, 2008
3. Burzykowski T. Surrogate endpoints: wishful thinking or reality? *Statistical Methods in Medical Research* 17: 463-6, 2008
4. Chakravarty A, Sridhara R. Use of progression-free survival as a surrogate marker in oncology trials: some regulatory issues. *Statistical Methods in Medical Research* 17: 515-18, 2008
5. Green EM, Yothers G, Sargent DJ. Surrogate endpoint validation: statistical elegance versus clinical relevance. *Statistical Methods in Medical Research* 17: 477-86, 2008
6. Grothey A. Surrogate endpoints for overall survival in early colorectal cancer from the clinician's perspective. *Statistical Methods in Medical Research* 17: 529-35, 2008
7. Hughes MD. Practical issues arising in an exploratory analysis evaluating progression-free survival as a surrogate endpoint for overall survival in advanced colorectal cancer. *Statistical Methods in Medical Research* 17: 487-95, 2008
8. Piedbois P, Croswell JM. Surrogate endpoints for overall survival in advanced colorectal cancer: a clinician's perspective. *Statistical Methods in Medical Research* 17: 519-27, 2008
9. Buyse M, Burzykowski T, Michiels S, Carroll K. Individual- and trial-level surrogacy in colorectal cancer. *Statistical Methods in Medical Research* 17: 467-75, 2008
10. Buyse M, Burzykowski T, Carroll K, et al. Progression-free survival is a surrogate for survival in advanced colorectal cancer. *J Clin Oncol* 25: 5218-24, 2007
11. Burzykowski T, Buyse M, Piccart-Gebhart MJ, et al. Evaluation of tumor response, disease control, progression-free survival, and time to progression as potential surrogate end points in metastatic breast cancer. *J Clin Oncol* 26: 1987-92, 2008
12. Fossella F, Pereira JR, von Pawel J, et al. Randomized, multinational, phase III study of docetaxel plus platinum combinations versus vinorelbine plus cisplatin for

- 1  
2  
3 advanced non-small-cell lung cancer: The TAX 326 study group. *J Clin Oncol* 21:  
4 3016–3024, 2003  
5  
6  
7 13. Monnier A, Zatloukal P, Sifflerova H, et al. Docetaxel (D) versus vinorelbine–  
8 cisplatin (VC) as front-line treatment for patients with advanced non-small cell lung  
9 cancer (NSCLC) and with a normal level of serum alpha 1 acid glycoprotein (AAG):  
10 Additional data on quality of life (QOL). Preliminary results. *Proc Am Soc Clin*  
11 *Oncol* 2003 [Abstract 2680].  
12  
13  
14 14. Kubota K, Watanabe K, Kunitoh H, et al. Phase III randomized trial of docetaxel plus  
15 cisplatin versus vindesine plus cisplatin in patients with stage IV non-small-cell lung  
16 cancer: The Japanese Taxotere Lung Cancer Study Group. *J Clin Oncol* 22: 254–261,  
17 2004  
18  
19  
20 15. Douillard JY, Gervais R, Dabouis G, et al. Sequential two-line strategy for stage IV  
21 non-small-cell lung cancer: docetaxel–cisplatin versus vinorelbine–cisplatin followed  
22 by crossover to single-agent docetaxel or vinorelbine at progression: final results of a  
23 randomized phase II study. *Ann Oncol* 16: 81–89, 2005  
24  
25  
26 16. Georgoulas V, Ardavanis A, Tsiadaki X, et al. Vinorelbine plus cisplatin versus  
27 docetaxel plus gemcitabine in advanced non-small-cell lung cancer: A phase III  
28 randomized trial. *J Clin Oncol* 23: 2937–2945, 2005  
29  
30  
31 17. Pujol JL, Breton JL, Gervais R, et al. Gemcitabine–docetaxel versus cisplatin–  
32 vinorelbine in advanced or metastatic non-small-cell lung cancer: A phase III study  
33 addressing the case for cisplatin. *Ann Oncol* 16: 602–610, 2005  
34  
35  
36 18. Kudoh S, Takeda K, Nakagawa K, et al. Phase III study of docetaxel compared with  
37 vinorelbine in elderly patients with advanced non-small-cell lung cancer: Results of  
38 the West Japan Thoracic Oncology Group Trial (WJTOG 9904). *J Clin Oncol* 24:  
39 3657–3663, 2006  
40  
41  
42 19. Douillard JY, Laporte S, Fossella F, et al. Comparison of docetaxel- and vinca  
43 alkaloid-based chemotherapy in the first-line treatment of advanced non-small cell  
44 lung cancer: a meta-analysis of seven randomized clinical trials. *J Thorac Oncol* 2:  
45 939-46, 2007  
46  
47  
48 20. Laporte S, Buyse M, Baroux N, Fossella F, et al. Meta-analysis comparing docetaxel  
49 and vinca-alkaloids in the first-line treatment of NSCLC. Comparison of results based  
50  
51  
52  
53  
54  
55  
56  
57  
58  
59  
60

1  
2  
3 on individual patient data, study report data, and published data. *Eur J Cancer Suppl.*  
4  
5 1: Abstract 4, 2007  
6

- 7 21. Burzykowski T, Molenberghs G, Buyse M, et al: Validation of surrogate endpoints in  
8 multiple randomized clinical trials with failure-time end points. *J R Stat Soc C* 50:  
9 405-422, 2001  
10  
11 22. Burzykowski T, Buyse M. Surrogate threshold effect: an alternative measure for  
12 meta-analytic surrogate endpoint validation. *Pharmaceutical Stat* 5: 173-186, 2006  
13  
14 23. Le Chevalier T, Scagliotti G, Natale R, et al. Efficacy of gemcitabine plus platinum  
15 chemotherapy compared with other platinum containing regimens in advanced non-  
16 small-cell lung cancer: a meta-analysis of survival outcomes. *Lung Cancer* 47: 69–80,  
17 2005  
18  
19 24. Soon YY, Stockler MR, Askie LM, Boyer MJ. Duration of chemotherapy for  
20 advanced non-small-cell lung cancer: a systematic review and meta-analysis of  
21 randomized trials. *J Clin Oncol* 27: 3277–3283, 2009  
22  
23 25. Broglio KR, Berry DA. Detecting and overall survival benefit that is derived from  
24 progression-free survival. *J Natl Cancer Inst* 101: 1642-1649, 2009  
25  
26 26. Johnson KR, Ringland C, Stodkes BJ, et al. Response rate or time to progression as  
27 predictors of survival in trials of metastatic colorectal cancer or non-small-cell lung  
28 cancer: a meta-analysis. *Lancet Oncology* 7: 741-6, 2006  
29  
30 27. Amit O, Mannino F, Stone AM, et al. Blinded independent central review of  
31 progression in cancer clinical trials: Results from a meta-analysis. *Eur J Cancer*  
32 47:1772-8; 2011  
33  
34 28. Soria JC, Massard C, Le Chevalier T. Should progression-free survival be the primary  
35 measure of efficacy for advanced NSCLC therapy? *Annals Oncol* 21: 2324-32, 2010  
36  
37  
38  
39  
40  
41  
42  
43  
44  
45  
46  
47  
48  
49  
50  
51  
52  
53  
54  
55  
56  
57  
58  
59  
60

**Table 1.** Trials included in the surrogacy analysis (N: number of patients randomized; D, docetaxel; C, cisplatin; Cb, carboplatin; G, gemcitabine, V, vinorelbine; AUC, Area Under the Curve; HORG, Hellenic Oncology Research Group; WJTOG, West Japan Thoracic Oncology Group; q3/4 wks = every 3/4 weeks). Drug doses are indicated in mg/m<sup>2</sup> except for Cb, which was dosed to obtain an AUC of 6 mg/mL.

| Trial name  | First Author | Accrual period | N    | Follow-up (months) | Docetaxel arm                                                | Vinorelbine arm          |
|-------------|--------------|----------------|------|--------------------|--------------------------------------------------------------|--------------------------|
| Tax 326     | Fossella     | 1998-2000      | 1218 | 21                 | D 75 C 75<br>q3 wks × 6<br>or<br>D 75 Cb AUC 6<br>q3 wks × 6 | V 25 C 100<br>q4 wks × 6 |
| HORG        | Georgoulis   | 1999-2002      | 413  | 20                 | D 100 G 1000<br>q3 wks × 6*                                  | V 30 C 80<br>q3 wks × 6* |
| French      | Pujol        | 1999-2001      | 311  | 25                 | D 85 G 1000<br>q3 wks × 8                                    | V 30 C 100<br>q4 wks × 6 |
| Taxobel 303 | Douillard    | 1998-2000      | 233  | 43                 | D 75 C 100<br>q3 wks × 6                                     | V 30 C 100<br>q3 wks × 6 |
| WJTOG 9904  | Kudoh        | 2000-2003      | 180  | 26                 | D 60<br>q3 wks × 4                                           | V 25<br>q4 wks × 3       |

\* Three additional cycles were given to patients in complete or partial response after the sixth cycle

Table 2. Baseline patient characteristics for the trials listed in Table 1 (BMI: body mass index; ECOG PS: Eastern Cooperative Oncology Group Performance Status).

| <b>Trial name</b> | <b>Age in years (median, range)</b> | <b>BMI (median, range)</b> | <b>Gender (Male / Female)</b> |
|-------------------|-------------------------------------|----------------------------|-------------------------------|
| Tax 326           | 60 (23 - 87)                        | 24.3 (15.4 – 49.6)         | 73% / 27%                     |
| HORG              | 64 (36 – 78)                        | Not available              | 89% / 11%                     |
| French            | 58 (37 – 75)                        | 23.9 (15.0 – 44.1)         | 80% / 20%                     |
| Taxobel 303       | 58 (27 – 77)                        | 23.6 (15.6 – 40.0)         | 82% / 18%                     |
| WJTOG 9904        | 76 (70 – 86)                        | 20.5 (14.4 – 28.8)         | 75% / 25%                     |

  

| <b>Trial name</b> | <b>ECOG PS (% 0 / % 1 / % 2+)</b> | <b>Stage (% IIIb / % IV)</b> | <b>Squamous cell carcinoma (% Yes / % No)</b> |
|-------------------|-----------------------------------|------------------------------|-----------------------------------------------|
| Tax 326           | 16% / 80% / 4%                    | 33% / 67%                    | 33% / 67%                                     |
| HORG              | 44% / 46% / 10%                   | 38% / 62%                    | Not available                                 |
| French            | 21% / 71% / 8%                    | 16% / 84%                    | 28% / 72%                                     |
| Taxobel 303       | 31% / 54% / 15%                   | 0% / 100%                    | 33% / 67%                                     |
| WJTOG 9904        | 0% / 96% / 4%                     | 36% / 64%                    | 33% / 67%                                     |



## LEGEND TO FIGURES

**Figure 1.** Kaplan-Meier estimates of overall survival and progression-free survival by treatment arm.

**Figure 2.** Forest plot of hazard ratios for overall survival and progression-free survival.

**Figure 3.** Correlation between treatment effects (log hazard ratios) on progression-free survival (horizontal axis) and overall survival (vertical axis) in participating centers. The size of each circle is proportional to the number of patients in the corresponding center. The reference circle in black corresponds to 10 patients.

**Figure 4.** Correlation between treatment effects (log hazard ratios) on progression-free survival (horizontal axis) and overall survival (vertical axis) in prognostic strata (see text). The size of each circle is proportional to the number of patients in the corresponding stratum. The reference circle in black corresponds to 10 patients.

1  
2  
3  
4  
5  
6  
7  
8  
9  
10  
11  
12  
13  
14  
15  
16  
17  
18  
19  
20  
21  
22  
23  
24  
25  
26  
27  
28  
29  
30  
31  
32  
33  
34  
35  
36  
37  
38  
39  
40  
41  
42  
43  
44  
45  
46  
47  
48  
49  
50  
51  
52  
53  
54  
55  
56  
57  
58  
59  
60

Figure 1

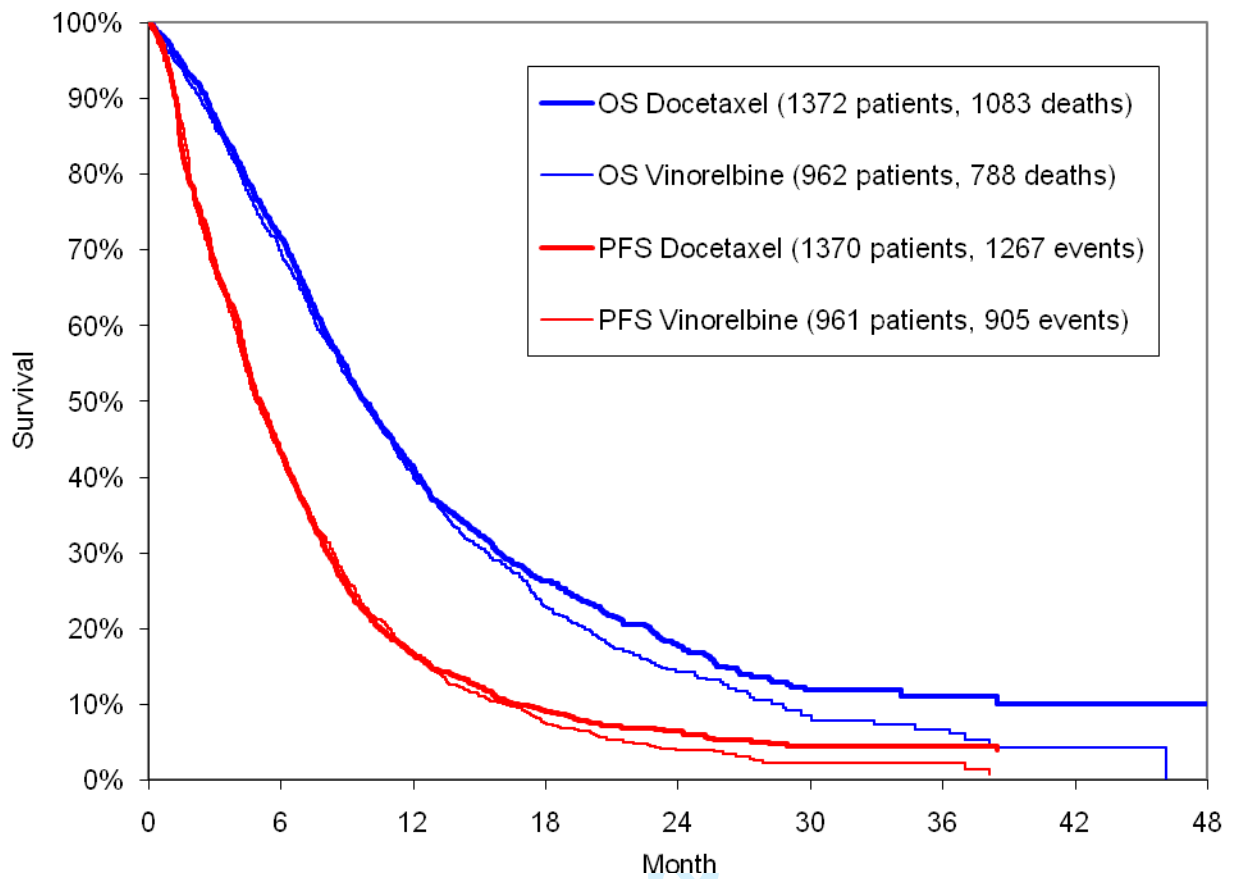

ew only

Figure 2

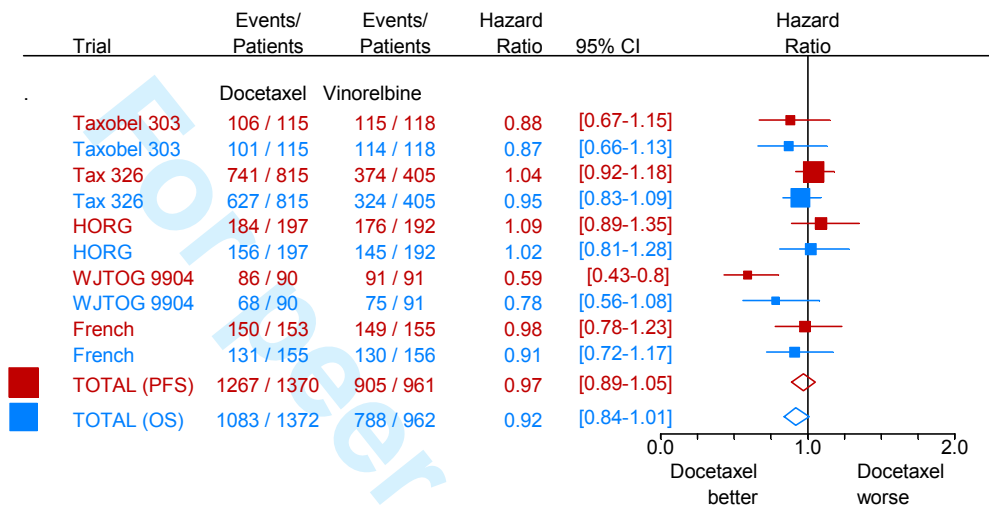

1  
2  
3  
4  
5  
6  
7  
8  
9  
10  
11  
12  
13  
14  
15  
16  
17  
18  
19  
20  
21  
22  
23  
24  
25  
26  
27  
28  
29  
30  
31  
32  
33  
34  
35  
36  
37  
38  
39  
40  
41  
42  
43  
44  
45  
46  
47  
48  
49  
50  
51  
52  
53  
54  
55  
56  
57  
58  
59  
60

Figure 3

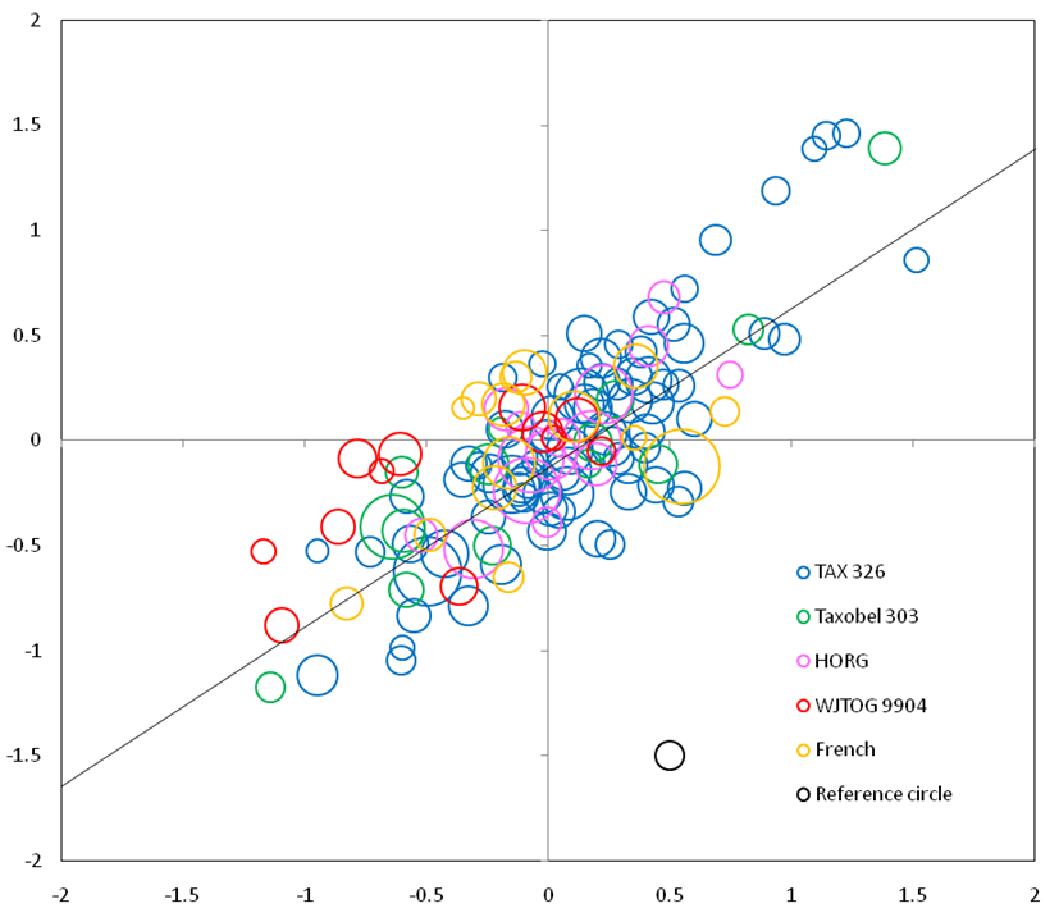

For peer review only

Figure 4

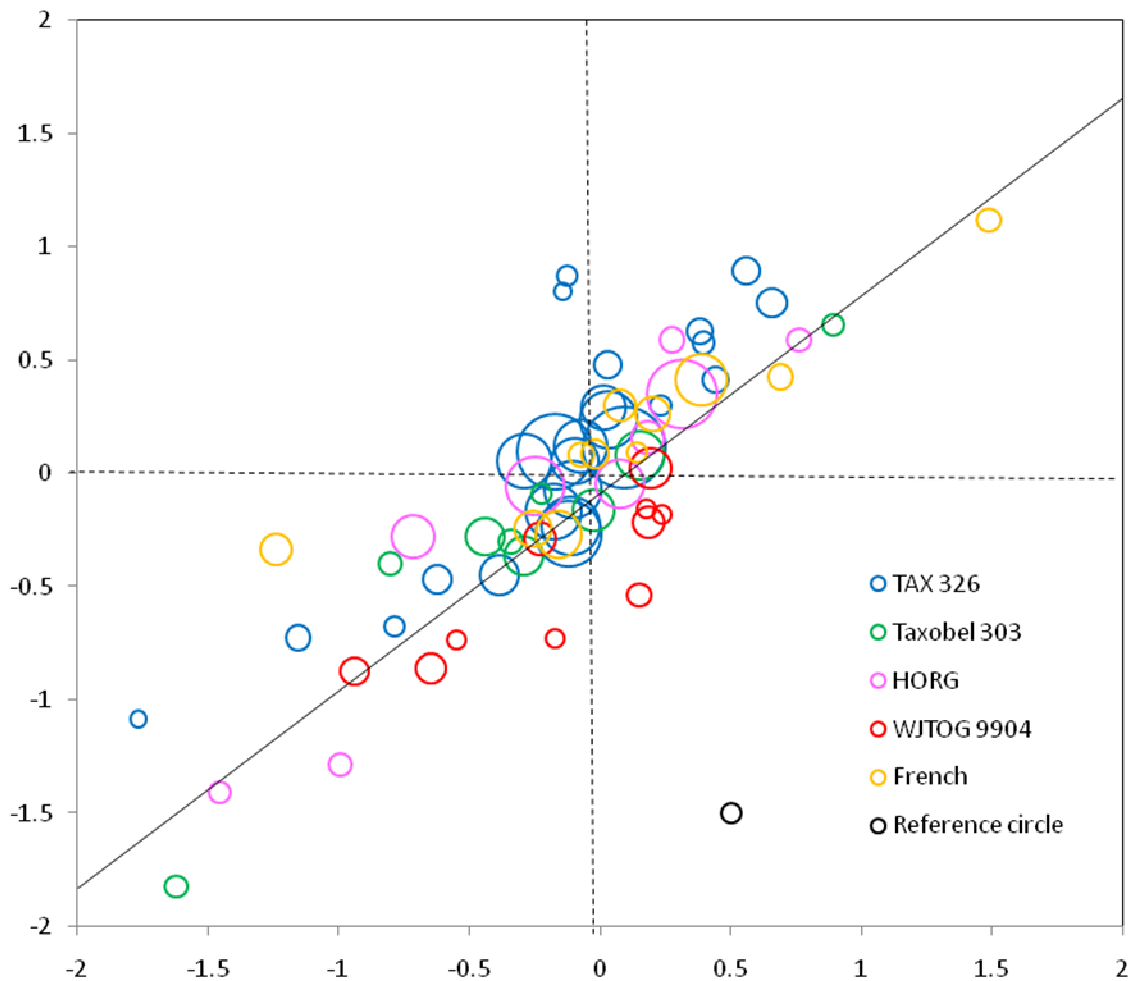

Only

1  
2  
3  
4  
5  
6  
7  
8  
9  
10  
11  
12  
13  
14  
15  
16  
17  
18  
19  
20  
21  
22  
23  
24  
25  
26  
27  
28  
29  
30  
31  
32  
33  
34  
35  
36  
37  
38  
39  
40  
41  
42  
43  
44  
45  
46  
47  
48  
49  
50  
51  
52  
53  
54  
55  
56  
57  
58  
59  
60

1  
2  
3  
4  
5  
6  
7  
8  
9  
10  
11  
12  
13  
14  
15  
16  
17  
18  
19  
20  
21  
22  
23  
24  
25  
26  
27  
28  
29  
30  
31  
32  
33  
34  
35  
36  
37  
38  
39  
40  
41  
42  
43  
44  
45  
46  
47  
48  
49  
50  
51  
52  
53  
54  
55  
56  
57  
58  
59  
60

Figure 1

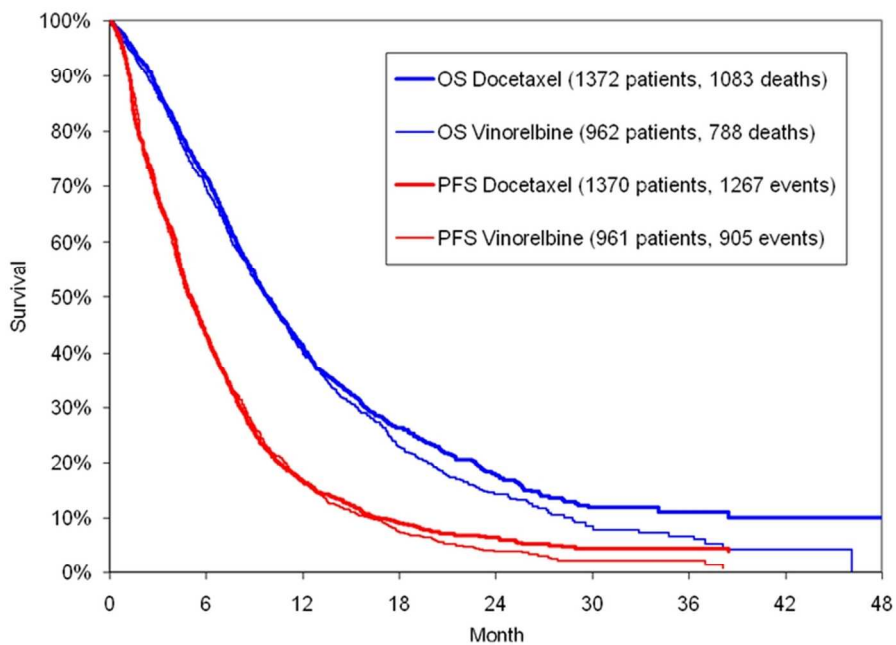

113x90mm (300 x 300 DPI)

ew only

Figure 2

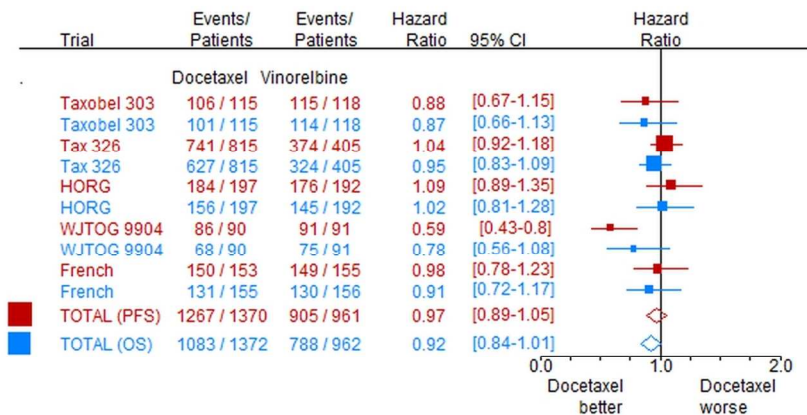

124x90mm (300 x 300 DPI)

1  
2  
3  
4  
5  
6  
7  
8  
9  
10  
11  
12  
13  
14  
15  
16  
17  
18  
19  
20  
21  
22  
23  
24  
25  
26  
27  
28  
29  
30  
31  
32  
33  
34  
35  
36  
37  
38  
39  
40  
41  
42  
43  
44  
45  
46  
47  
48  
49  
50  
51  
52  
53  
54  
55  
56  
57  
58  
59  
60

Figure 3

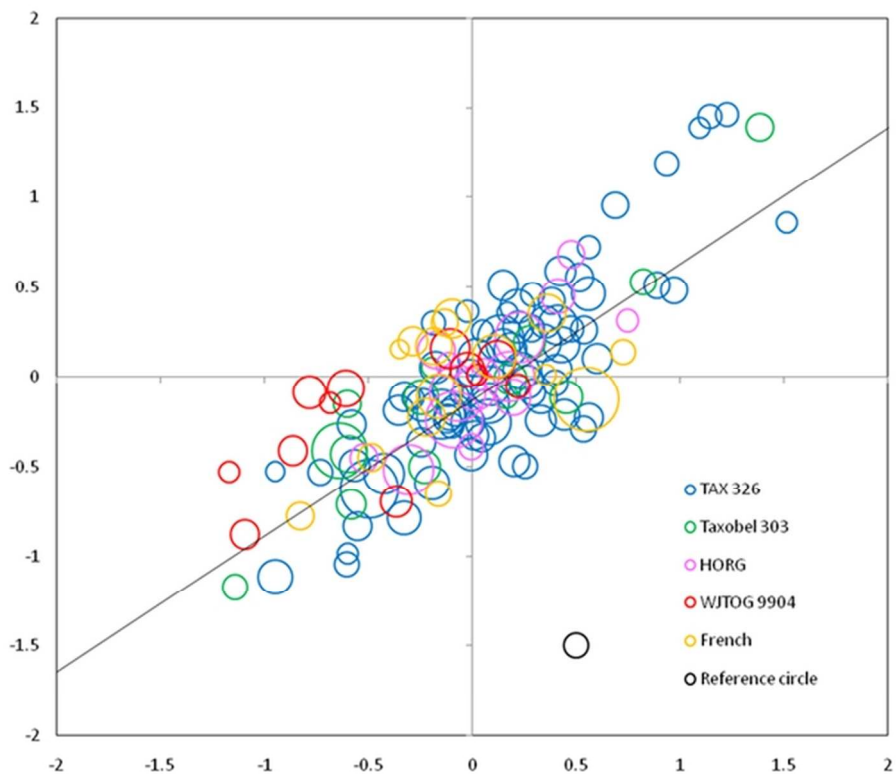

97x90mm (300 x 300 DPI)

only



Figure 4

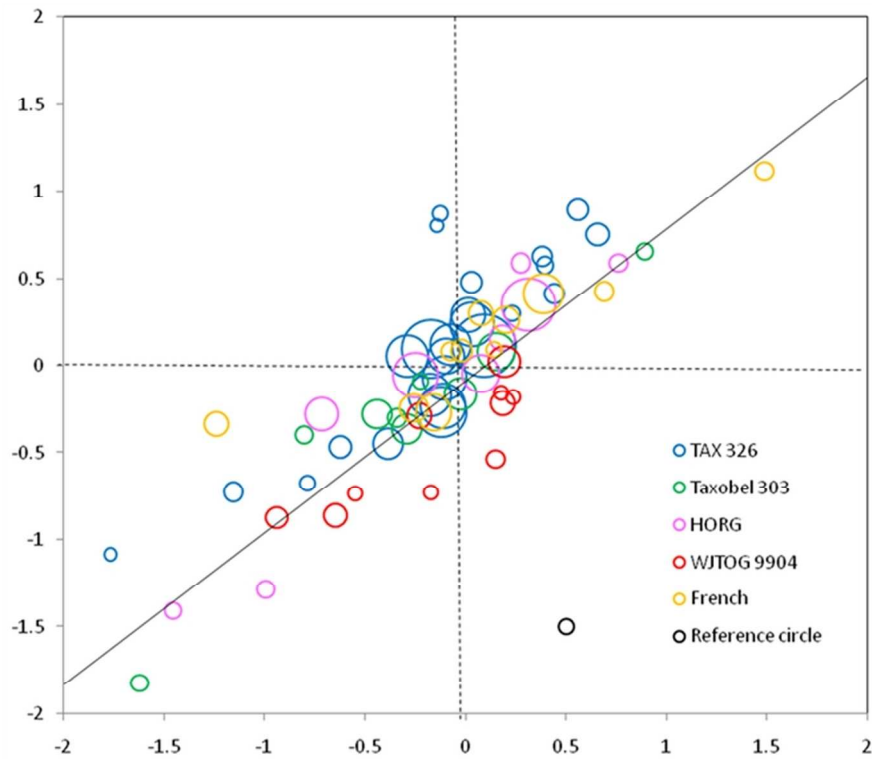

103x90mm (300 x 300 DPI)
